# Supplementary material for: Electrosynthesis of sulfonamides from DMSO and amines under mild conditions
Source: Royal Society of Chemistry journal article supplement (doi:10.1039/d1cc00026h), 2021-01-01

## Supporting Information

### Electrosynthesis of Sulfonamides from DMSO and Amines under Mild Conditions

Zhiguan Lin, Liangbin Huang\* and Gaoqing Yuan\*

Key Laboratory of Functional Molecular Engineering of Guangdong Province, School of  
Chemistry and Chemical Engineering, South China University of Technology  
Guangzhou 510640, China

E-mail: [ggyuan@scut.edu.cn](mailto:ggyuan@scut.edu.cn); [huanglb@scut.edu.cn](mailto:huanglb@scut.edu.cn)

#### List of contents

|                                                                        |     |
|------------------------------------------------------------------------|-----|
| 1. General information .....                                           | S2  |
| 2. General procedure for the synthesis of Sulfonamides .....           | S2  |
| 3. Experiments of phenylmethanethiol and (methylsulfinyl)benzene ..... | S3  |
| 4. The preparing of <b>5a</b> .....                                    | S4  |
| 5. Characterization data of products .....                             | S4  |
| 6. References .....                                                    | S10 |
| 7. NMR spectra of products .....                                       | S11 |

## 1. General information

Unless otherwise stated, analytical grade commercial reagents and solvents were used as the received. Amines were bought from Alfa Aesar, Acros and Aldrich. Analytical thin layer chromatography (TLC) was performed by using commercially prepared 100–400 mesh silica gel plates (GF254) and visualization was effected at 254 nm.  $^1\text{H}$  and  $^{13}\text{C}$  NMR spectra were recorded on a Bruker Avance 400 MHz NMR spectrometer (400 MHz for  $^1\text{H}$ , 100 MHz for  $^{13}\text{C}$ ),  $\text{CDCl}_3$  was used as the solvent with TMS as the internal standard. Mass spectra were recorded on a Shimadzu GCMS-QP5050A spectrometer at an ionization voltage of 70 eV equipped with a DB-WAX capillary column (internal diameter: 0.25 mm, length: 30 m). HRMS analysis was performed in an Agilent 1290/Bruker maXis Impact high resolution mass spectrometer. Melting points were determined with a TA DSC250 instrument.

## 2. General procedure for the synthesis of Sulfonamides

In a typical procedure, amine (0.5 mmol), KI (0.2 mol  $\text{L}^{-1}$ ), and DMSO (5 mL) were added to the undivided cell which was equipped with a Pt plate anode (10 mm  $\times$  10 mm  $\times$  0.1 mm) and Ni plate cathode (10 mm  $\times$  10 mm  $\times$  0.1 mm). The anode and cathode were connecting to a DC regulated power supply. The electrosynthesis was carried out with current 30 mA at room temperature for 8 h under magnetic stirring. After the electrolysis, the reaction mixture was decolorized with saturated aqueous  $\text{Na}_2\text{S}_2\text{O}_3$  solution, and then washed with distilled water (50 mL) and extracted with ethyl acetate (15 mL  $\times$  3). The organic layer was dried over anhydrous  $\text{MgSO}_4$  and concentrated in vacuum. The crude product was purified by column chromatography on silica gel with petroleum ether-ethyl acetate (v/v=15:1) as eluent to give pure desired product.

### 3. Experiments of phenylmethanethiol and (methylsulfinyl)benzene

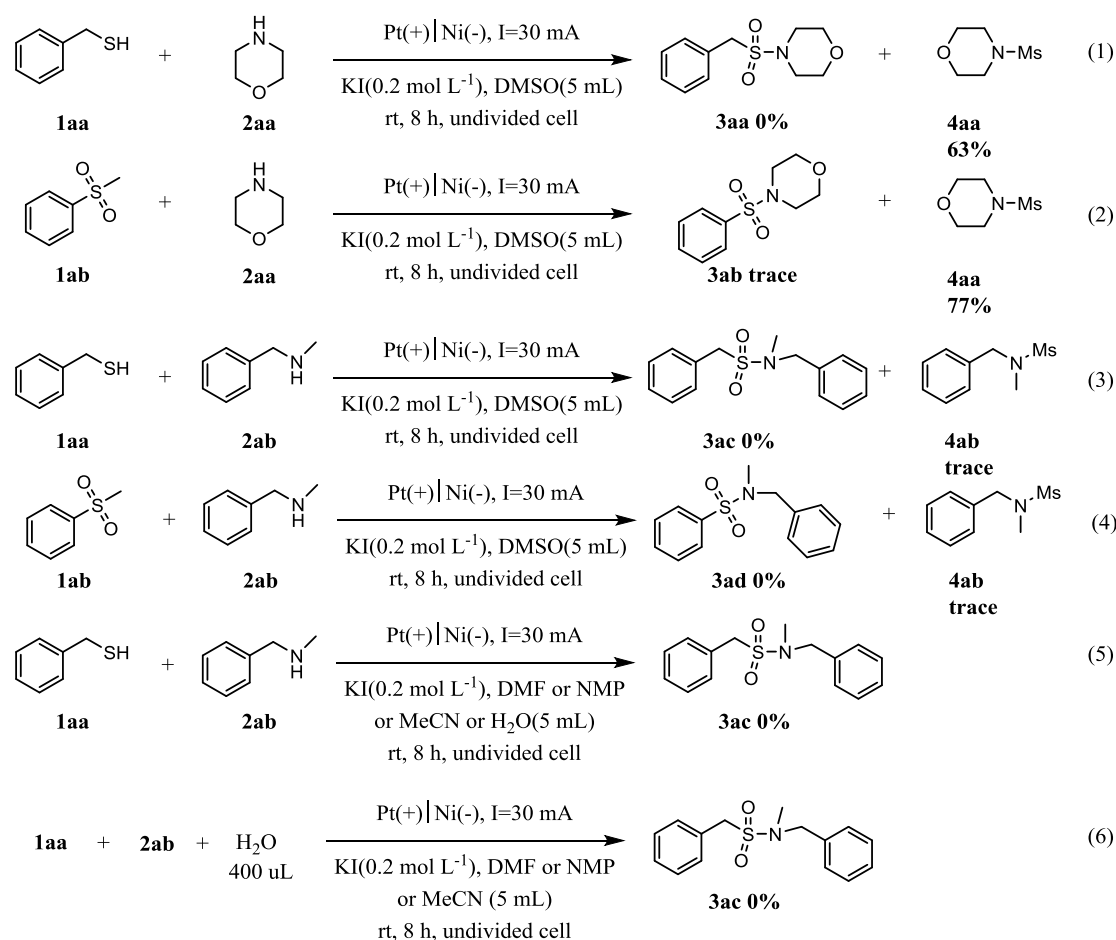

Pt plate (10 mm × 10 mm × 0.1 mm) anode, Ni plate (10 mm × 10 mm × 0.1 mm) cathode, constant current = 30 mA, **1aa** (0.5 mmol), **2aa** (0.5 mmol), **1ab** (0.5 mmol), **2ab** (0.5 mmol), KI (0.2 mol L<sup>-1</sup>), DMSO (5.0 mL), room temperature, 8 h, under air and an undivided cell. Yield was analyzed by GC-MS with *n*-dodecane as an internal standard.

The corresponding product could not be detected when phenylmethanethiol was used as a raw material both in the presence of DMSO and in the absence of DMSO (eq 1, eq 3, eq 5, eq 6). The corresponding product just can be detected by GC-MS when (methylsulfinyl)benzene was used as the raw material (eq 2).

## 4. The preparing of 5a

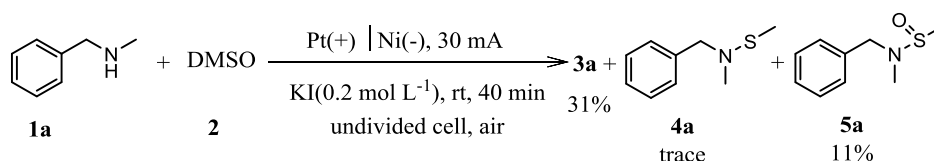

In a typical procedure, **1a** (0.5 mmol), KI (0.2 mol L<sup>-1</sup>), and DMSO (5 mL) were added to the undivided cell which was equipped with a Pt plate anode and Ni plate cathode. The electrolysis was carried out with current 30 mA at room temperature for 40 minutes under magnetic stirring. The reaction mixture was decolorized with saturated aqueous Na<sub>2</sub>S<sub>2</sub>O<sub>3</sub> solution, and then washed with distilled water (50 mL) and extracted with ethyl acetate (15 mL × 3). The organic layer was dried over anhydrous MgSO<sub>4</sub> and concentrated in vacuum. The crude product was purified by column chromatography on silica gel with petroleum ether-ethyl acetate (v/v=15:1) as eluent to give pure desired product.

## 5. Characterization data of products

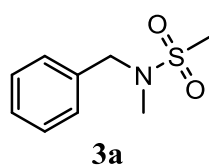

**3a** *N*-Methyl-*N*-benzylmethanesulfonamide (**3a**);<sup>[1]</sup> 81 mg as brown liquid. <sup>1</sup>H NMR (400 MHz, CDCl<sub>3</sub>) δ 7.43 – 7.28 (m, 5H), 4.31 (s, 2H), 2.83 (s, 3H), 2.77 (s, 3H). <sup>13</sup>C NMR (100 MHz, CDCl<sub>3</sub>) δ 135.58, 128.78, 128.40, 128.08, 53.92, 35.98, 34.33.

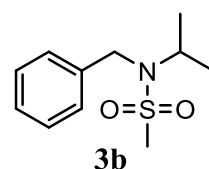

**3b** *N*-Benzyl-*N*-isopropylmethanesulfonamide (**3b**);<sup>[2]</sup> 90 mg as white solid mp 75-76 °C. <sup>1</sup>H NMR (400 MHz, CDCl<sub>3</sub>) δ 7.41 (d, *J* = 7.4 Hz, 2H), 7.33 (t, *J* = 7.3 Hz, 2H), 7.27 (d, *J* = 8.2 Hz, 1H), 4.37 (s, 2H), 4.14 (dt, *J* = 13.4, 6.7 Hz, 1H), 2.80 (s, 3H), 1.18 (d, *J* = 6.8 Hz, 6H). <sup>13</sup>C NMR (100 MHz, CDCl<sub>3</sub>) δ 138.38, 128.51, 127.92, 127.49, 50.24, 46.70, 40.47, 21.63.

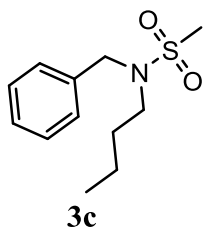

***N*-Benzyl-*N*-butylmethanesulfonamide (3c)**; 106 mg as brown liquid.  $^1\text{H}$  NMR (400 MHz,  $\text{CDCl}_3$ )  $\delta$  7.38 – 7.30 (m, 5H), 4.39 (s, 2H), 3.19 – 3.13 (m, 2H), 2.83 (s, 3H), 1.55 – 1.46 (m, 2H), 1.26 (t,  $J = 7.4$  Hz, 2H), 0.86 (t,  $J = 7.3$  Hz, 3H).  $^{13}\text{C}$  NMR (100 MHz,  $\text{CDCl}_3$ )  $\delta$  136.23, 128.71, 128.41, 127.95, 50.92, 47.11, 39.16, 30.04, 19.87, 13.68. HRMS (ESI,  $m/z$ ): Calcd. for  $\text{C}_{12}\text{H}_{19}\text{NNaO}_2\text{S}$  [ $\text{M}+\text{Na}$ ] $^+$  236.0722, found 236.0721.

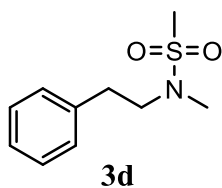

***N*-Methyl-*N*-phenethylmethanesulfonamide (3d)**; 91 mg as white solid, mp 64–65 °C.  $^1\text{H}$  NMR (400 MHz,  $\text{CDCl}_3$ )  $\delta$  7.37 – 7.31 (m, 2H), 7.25 (d,  $J = 7.4$  Hz, 3H), 3.43 (t,  $J = 7.5$  Hz, 2H), 2.92 (t,  $J = 7.5$  Hz, 2H), 2.88 (s, 3H), 2.66 (s, 3H).  $^{13}\text{C}$  NMR (100 MHz,  $\text{CDCl}_3$ )  $\delta$  138.31, 128.89, 128.68, 126.73, 51.67, 36.17, 34.87. HRMS (ESI,  $m/z$ ): Calcd. for  $\text{C}_{10}\text{H}_{15}\text{NNaO}_2\text{S}$  [ $\text{M}+\text{Na}$ ] $^+$  236.0722, found 236.0721.

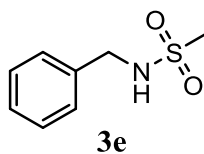

***N*-Benzylmethanesulfonamide (3e)**; <sup>[3]</sup> 67 mg as white solid, mp 62–63 °C.  $^1\text{H}$  NMR (400 MHz,  $\text{CDCl}_3$ )  $\delta$  7.46 – 7.28 (m, 5H), 5.07 (s, 1H), 4.29 (d,  $J = 6.0$  Hz, 2H), 2.82 (s, 3H).  $^{13}\text{C}$  NMR (100 MHz,  $\text{CDCl}_3$ )  $\delta$  136.69, 128.94, 128.14, 127.93, 47.22, 41.13.

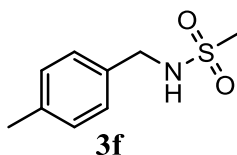

***N*-(4-Methylbenzyl) methanesulfonamide (3f)**; <sup>[3]</sup> 78 mg as white solid, mp 97–98 °C.  $^1\text{H}$  NMR (400 MHz,  $\text{CDCl}_3$ )  $\delta$  7.23 (d,  $J = 7.7$  Hz, 2H), 7.17 (d,  $J = 7.7$  Hz, 2H), 4.81 (s, 1H), 4.27 (d,  $J = 6.0$  Hz, 2H), 2.84 (s, 3H), 2.34 (s, 3H).  $^{13}\text{C}$  NMR (100 MHz,  $\text{CDCl}_3$ )  $\delta$  137.92, 133.64, 129.58, 127.92, 46.99, 41.09, 21.15.

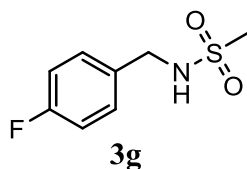

***N*-(4-Fluorobenzyl) methanesulfonamide (3g)**; 77 mg as white solid, mp 52–53 °C.  $^1\text{H}$  NMR (400 MHz,  $\text{CDCl}_3$ )  $\delta$  7.38 – 7.30 (m, 2H), 7.05 (t,  $J = 8.3$  Hz, 2H), 5.02 (s, 1H), 4.27 (d,  $J = 5.9$  Hz, 2H), 2.85 (s, 3H).  $^{13}\text{C}$  NMR (100 MHz,  $\text{CDCl}_3$ )  $\delta$  163.69, 161.24, 132.58, 129.72, 115.80, 46.45, 41.12. HRMS (ESI,  $m/z$ ): Calcd. for  $\text{C}_{10}\text{H}_{10}\text{FNNaO}_2\text{S}$  [ $\text{M}+\text{Na}$ ] $^+$  226.0308, found 226.0314.

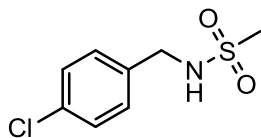

**3h**

*N*-(4-Chlorobenzyl)methanesulfonamide (**3h**);<sup>[3]</sup> 80 mg as white solid, mp 133-134 °C. <sup>1</sup>H NMR (400 MHz, CDCl<sub>3</sub>) δ 7.34 (d, *J* = 8.4 Hz, 2H), 7.29 (d, *J* = 8.4 Hz, 2H), 4.87 (s, 1H), 4.28 (d, *J* = 6.0 Hz, 2H), 2.88 (s, 3H). <sup>13</sup>C NMR (100 MHz, CDCl<sub>3</sub>) δ 135.28, 134.01, 129.17, 46.48, 41.24.

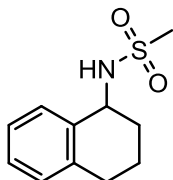

**3i**

*N*-(1,2,3,4-Tetrahydronaphthalen-1-yl)methanesulfonamide (**3i**);<sup>[4]</sup> 99 mg as white solid, mp 109-110 °C. <sup>1</sup>H NMR (400 MHz, CDCl<sub>3</sub>) δ 7.48 – 7.40 (m, 1H), 7.24 – 7.16 (m, 2H), 7.13 – 7.07 (m, 1H), 4.73 (s, 1H), 4.66 (s, 1H), 3.05 (s, 3H), 2.80 (d, *J* = 18.6 Hz, 2H), 2.11 (s, 1H), 1.91 (d, *J* = 17.8 Hz, 3H). <sup>13</sup>C NMR (100 MHz, CDCl<sub>3</sub>) δ 137.54, 135.72, 129.34, 128.81, 127.79, 126.44, 52.23, 42.16, 31.51, 28.88, 19.37.

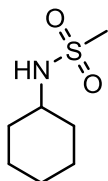

**3j**

*N*-Cyclohexylmethanesulfonamide (**3j**);<sup>[5]</sup> 77 mg as white solid, mp 106-107 °C. <sup>1</sup>H NMR (400 MHz, CDCl<sub>3</sub>) δ 4.58 (s, 1H), 3.31 (s, 1H), 2.99 (s, 3H), 1.99 (d, *J* = 11.8 Hz, 2H), 1.78 – 1.72 (m, 2H), 1.60 (d, *J* = 13.0 Hz, 1H), 1.36 – 1.20 (m, 5H). <sup>13</sup>C NMR (100 MHz, CDCl<sub>3</sub>) δ 52.84, 42.05, 34.38, 25.14, 24.78.

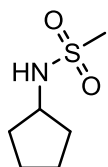

**3k**

*N*-Cyclopentylmethanesulfonamide (**3k**);<sup>[6]</sup> 73 mg as brown liquid. <sup>1</sup>H NMR (400 MHz, CDCl<sub>3</sub>) δ 4.59 (s, 1H), 3.80 (dd, *J* = 13.8, 6.8 Hz, 1H), 2.99 (s, 3H), 2.02 (dt, *J* = 12.0, 6.3 Hz, 2H), 1.75 – 1.49 (m, 6H). <sup>13</sup>C NMR (100 MHz, CDCl<sub>3</sub>) δ 55.26, 41.34, 33.84, 23.20.

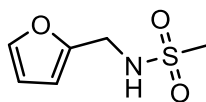

**3l**

*N*-(Furan-2-ylmethyl)methanesulfonamide (**3l**);<sup>[7]</sup> 72 mg as brown liquid. <sup>1</sup>H NMR (400 MHz, CDCl<sub>3</sub>) δ 7.43 (s, 1H), 6.36 (d, *J* = 9.9 Hz, 2H), 4.83 (s, 1H), 4.36 (d, *J* = 5.8 Hz, 2H), 2.87 (s, 3H). <sup>13</sup>C NMR (100 MHz, CDCl<sub>3</sub>) δ 150.05, 142.92, 110.64, 108.65, 41.22, 39.99.

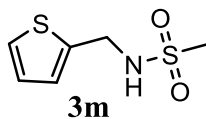

**3m**

**N-(Thiophen-2-ylmethyl)methanesulfonamide (3m);**<sup>[7]</sup> 83 mg as brown liquid.

<sup>1</sup>H NMR (400 MHz, CDCl<sub>3</sub>) δ 7.29 (d, *J* = 5.1 Hz, 1H), 7.05 (s, 1H), 6.99 – 6.95 (m, 1H), 4.77 (s, 1H), 4.52 (d, *J* = 5.7 Hz, 1H), 2.87 (s, 3H). <sup>13</sup>C NMR (100 MHz, CDCl<sub>3</sub>) δ 139.55, 127.16, 126.84, 126.05, 41.97, 41.53.

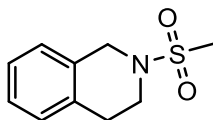

**3n**

**2-(Methylsulfonyl)-1,2,3,4-tetrahydroisoquinoline (3n);**<sup>[8]</sup> 101 mg as white solid,

mp 129-130 °C. <sup>1</sup>H NMR (400 MHz, CDCl<sub>3</sub>) δ 7.19 (dd, *J* = 26.2, 14.5 Hz, 4H), 4.49 (s, 2H), 3.59 (t, *J* = 5.8 Hz, 2H), 3.01 (t, *J* = 5.7 Hz, 2H), 2.87 (s, 3H). <sup>13</sup>C NMR (100 MHz, CDCl<sub>3</sub>) δ 133.16, 129.07, 127.04, 126.59, 126.39, 47.30, 43.46, 35.88, 28.70

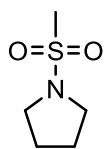

**3o**

**1-(Methylsulfonyl)pyrrolidine (3o);**<sup>[2]</sup> 65 mg as brown solid, mp 70-71 °C. <sup>1</sup>H NMR (400 MHz, CDCl<sub>3</sub>) δ 3.32 (t, *J* = 6.1 Hz, 4H), 2.81 (s, 3H), 1.98 – 1.91 (m, 4H). <sup>13</sup>C NMR (100 MHz, CDCl<sub>3</sub>) δ 47.88, 34.44, 25.72.

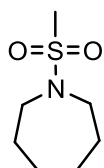

**3p**

**1-(Methylsulfonyl)azepane (3p);** 82 mg as brown solid, mp 45-46 °C. <sup>1</sup>H NMR (400

MHz, CDCl<sub>3</sub>) δ 3.36 – 3.32 (m, 4H), 2.81 (s, 3H), 1.76 (s, 4H), 1.64 (s, 4H). <sup>13</sup>C NMR (100 MHz, CDCl<sub>3</sub>) δ 48.06, 36.88, 29.33, 26.94. HRMS (ESI, *m/z*): Calcd. for C<sub>7</sub>H<sub>15</sub>NNaO<sub>2</sub>S [M+Na]<sup>+</sup> 200.0713, found 200.0716.

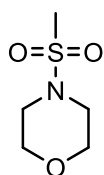

**3q**

**4-(Methylsulfonyl)morpholine (3q);**<sup>[9]</sup> 82 mg as white solid, mp 91-92 °C. <sup>1</sup>H NMR (400 MHz, CDCl<sub>3</sub>) δ 3.74 – 3.70 (m, 4H), 3.16 – 3.12 (m, 3H), 2.73 (s, 4H). <sup>13</sup>C NMR (100 MHz, CDCl<sub>3</sub>) δ 66.30, 45.86, 33.95.

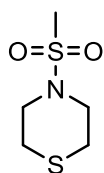

**3r**

**4-(Methylsulfonyl)thiomorpholine (3r);**<sup>[9]</sup> 82 mg as white solid, mp 131-132 °C. <sup>1</sup>H NMR

(400 MHz, CDCl<sub>3</sub>)  $\delta$  3.54 (s, 4H), 2.81 (s, 3H), 2.76 (s, 4H). <sup>13</sup>C NMR (100 MHz, CDCl<sub>3</sub>)  $\delta$  47.67, 35.85, 27.53.

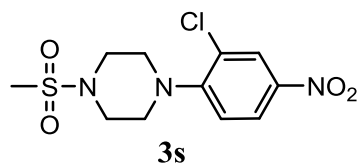

**1-(2-Chloro-4-nitrophenyl)-4-(methylsulfonyl)piperazine (3s)**; 129

mg as brown solid, mp 178-179 °C. <sup>1</sup>H NMR (400 MHz, CDCl<sub>3</sub>)  $\delta$  8.28 (d,  $J$  = 2.5 Hz, 1H), 8.13 (dd,  $J$  = 8.9, 2.5 Hz, 1H), 7.09 (d,  $J$  = 8.9 Hz, 1H), 3.49 – 3.43 (m, 4H), 3.33 – 3.27 (m, 4H), 2.87 (s, 3H). <sup>13</sup>C NMR (100 MHz, CDCl<sub>3</sub>)  $\delta$  154.01, 142.96, 128.15, 126.63, 123.53, 119.97, 50.33, 45.83, 34.66, 29.71. HRMS (ESI,  $m/z$ ): Calcd. for C<sub>11</sub>H<sub>14</sub>ClN<sub>3</sub>NaO<sub>4</sub>S [M+Na]<sup>+</sup> 342.0280, found 342.0286.

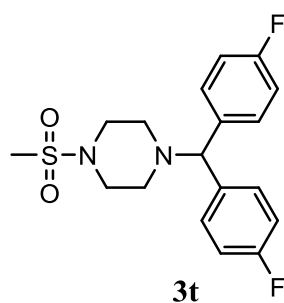

**1-(Bis(4-fluorophenyl)methyl)-4-(methylsulfonyl)piperazine (3t)**; 118 mg

as brown solid, mp 199-200 °C. <sup>1</sup>H NMR (400 MHz, CDCl<sub>3</sub>)  $\delta$  7.37 – 7.29 (m, 4H), 6.98 (t,  $J$  = 8.5 Hz, 4H), 4.28 (s, 1H), 3.23 (s, 4H), 2.79 (s, 3H), 2.47 (s, 4H). <sup>13</sup>C NMR (100 MHz, CDCl<sub>3</sub>)  $\delta$  163.19, 160.74, 137.50, 129.19, 115.77, 115.56, 73.97, 50.99, 46.08, 34.12. HRMS (ESI,  $m/z$ ): Calcd. for C<sub>18</sub>H<sub>21</sub>F<sub>2</sub>N<sub>2</sub>O<sub>2</sub>S [M+Na]<sup>+</sup> 367.1284, found 367.1286.

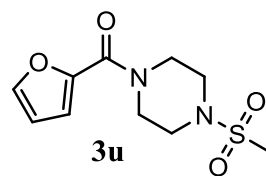

**Furan-2-yl(4-(methylsulfonyl)piperazin-1-yl)methanone (3u)**; 112 mg as

white solid, mp 155-156 °C. <sup>1</sup>H NMR (400 MHz, CDCl<sub>3</sub>)  $\delta$  7.51 (s, 1H), 7.08 (d,  $J$  = 3.3 Hz, 1H), 6.52 (s, 1H), 3.94 (s, 4H), 3.33 – 3.29 (m, 4H), 2.81 (s, 3H). <sup>13</sup>C NMR (100 MHz, CDCl<sub>3</sub>)  $\delta$  159.09, 147.49, 144.06, 117.48, 111.63, 45.99, 34.70. HRMS (ESI,  $m/z$ ): Calcd. for C<sub>10</sub>H<sub>15</sub>N<sub>2</sub>O<sub>4</sub>S [M+H]<sup>+</sup> 259.0752; found 259.0749.

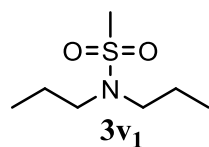

**N,N-Dipropylmethanesulfonamide(3v1)**; <sup>[10]</sup> 72 mg as brown liquid. <sup>1</sup>H NMR (400

MHz, CDCl<sub>3</sub>)  $\delta$  3.16 – 3.10 (m, 4H), 2.83 (s, 3H), 1.63 (dd,  $J$  = 15.2, 7.3 Hz, 4H), 0.92 (t,  $J$  = 7.4 Hz, 6H). <sup>13</sup>C NMR (100 MHz, CDCl<sub>3</sub>)  $\delta$  49.58, 38.28, 22.02, 11.17.

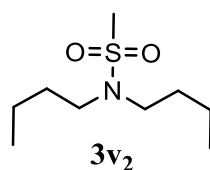

**N,N-Dibutylmethanesulfonamide (3v2)**; 78 mg as brown liquid. <sup>1</sup>H NMR (400

MHz, CDCl<sub>3</sub>)  $\delta$  3.16 (t,  $J$  = 7.6 Hz, 4H), 2.82 (s, 3H), 1.63 – 1.53 (m, 4H), 1.35 (dt,  $J$  = 14.8, 7.3 Hz,



4H), 0.94 (t,  $J = 7.3$  Hz, 6H).  $^{13}\text{C}$  NMR (100 MHz,  $\text{CDCl}_3$ )  $\delta$  47.54, 38.26, 30.81, 19.94, 13.74. HRMS (ESI,  $m/z$ ): Calcd. for  $\text{C}_9\text{H}_{21}\text{NNaO}_2\text{S}$   $[\text{M}+\text{Na}]^+$  230.1181, found 230.1185.

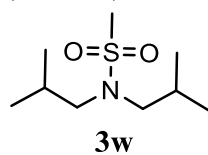

***N,N*-Diisobutylmethanesulfonamide (3w)**; 83 mg as brown liquid.  $^1\text{H}$  NMR (400 MHz,  $\text{CDCl}_3$ )  $\delta$  3.16 (t,  $J = 7.6$  Hz, 4H), 2.82 (s, 3H), 1.63 – 1.53 (m, 4H), 1.35 (dt,  $J = 14.8, 7.3$  Hz, 4H), 0.94 (t,  $J = 7.3$  Hz, 6H).  $^{13}\text{C}$  NMR (100 MHz,  $\text{CDCl}_3$ )  $\delta$  47.54, 38.26, 30.81, 19.94, 13.74. HRMS (ESI,  $m/z$ ): Calcd. for  $\text{C}_9\text{H}_{21}\text{NNaO}_2\text{S}$   $[\text{M}+\text{Na}]^+$  230.1185, found 230.1185.

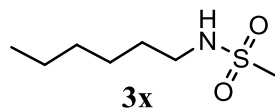

***N*-Hexylmethanesulfonamide (3x)**,<sup>[11]</sup> 67 mg as brown liquid.  $^1\text{H}$  NMR (400 MHz,  $\text{CDCl}_3$ )  $\delta$  4.64 (s, 1H), 3.15 – 3.09 (m, 2H), 2.96 (s, 3H), 1.59 – 1.53 (m, 2H), 1.31 (s, 6H), 0.89 (t,  $J = 6.0$  Hz, 3H).  $^{13}\text{C}$  NMR (100 MHz,  $\text{CDCl}_3$ )  $\delta$  43.36, 40.12, 31.32, 30.04, 26.24, 22.51, 13.99.

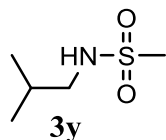

***N*-Isobutylmethanesulfonamide (3y)**,<sup>[12]</sup> 59 mg as brown liquid.  $^1\text{H}$  NMR (400 MHz,  $\text{CDCl}_3$ )  $\delta$  4.79 (s, 1H), 2.99 – 2.91 (m, 5H), 1.82 (dt,  $J = 13.3, 6.7$  Hz, 1H), 0.96 (d,  $J = 6.7$  Hz, 6H).  $^{13}\text{C}$  NMR (100 MHz,  $\text{CDCl}_3$ )  $\delta$  50.64, 40.08, 28.77, 19.86.

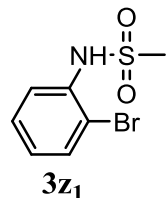

***N*-(2-Bromophenyl)methanesulfonamide (3z<sub>1</sub>)**,<sup>[13]</sup> 106 mg as brown liquid.  $^1\text{H}$  NMR (400 MHz,  $\text{CDCl}_3$ )  $\delta$  7.67 (d,  $J = 8.0$  Hz, 1H), 7.59 (d,  $J = 8.0$  Hz, 1H), 7.35 (t,  $J = 7.7$  Hz, 1H), 7.08 (d,  $J = 15.2$  Hz, 1H), 6.80 (s, 1H), 3.01 (s, 3H).  $^{13}\text{C}$  NMR (100 MHz,  $\text{CDCl}_3$ )  $\delta$  134.83, 132.97, 129.02, 126.74, 122.65, 115.62, 39.91.

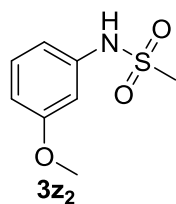

***N*-(3-Methoxyphenyl)methanesulfonamide (3z<sub>2</sub>)**,<sup>[14]</sup> 106 mg as brown liquid.  $^1\text{H}$  NMR (400 MHz,  $\text{CDCl}_3$ )  $\delta$  7.27 – 7.22 (m, 1H), 6.83 – 6.71 (m, 4H), 3.81 (s, 3H), 3.02 (s, 3H).  $^{13}\text{C}$  NMR (400 MHz,  $\text{CDCl}_3$ )  $\delta$  160.69, 137.97, 130.49, 112.62, 110.86, 106.47, 55.42, 39.30.

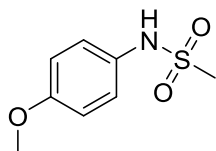

**3z<sub>3</sub>**

*N*-(4-Methoxyphenyl)methanesulfonamide (**3z<sub>3</sub>**);<sup>[14]</sup> 46 mg as brown liquid.

<sup>1</sup>H NMR (400 MHz, CDCl<sub>3</sub>) δ 7.27 – 7.18 (m, 3H), 6.89 (d, *J* = 8.9 Hz, 2H), 3.80 (s, 3H), 2.95 (s, 3H).

<sup>13</sup>C NMR (400 MHz, CDCl<sub>3</sub>) δ 158.20, 128.97, 124.90, 114.86, 55.54, 38.97.

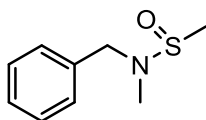

**5a**

*N*-Benzyl-*N*-methylmethanesulfonamide (**5a**), yellow liquid. <sup>1</sup>H NMR (400 MHz, CDCl<sub>3</sub>) δ 7.37 – 7.27 (m, 5H), 4.25 (d, *J* = 14.3 Hz, 2H), 2.65 (d, *J* = 7.1 Hz, 6H). <sup>13</sup>C NMR (100 MHz, CDCl<sub>3</sub>) δ 136.84, 128.64, 128.17, 127.72, 55.89, 40.23, 31.80. MS (EI) *m/z*: 183, 168, 118, 91, 77, 65.

## 6. References

- 1 Z. Li, L. Jin and C. Cai, *Org. Biomol. Chem.*, 2017, **15**, 1317-1320.
- 2 G. Zhou, P. Ting, R. Aslanian and J. J. Piwinski, *Org. Lett.*, 2008, **10**, 2517-2520.
- 3 Q. Xu, Q. Li, X. Zhu and J. Chen, *Adv. Synth. Catal.*, 2013, **355**, 73-80.
- 4 J. Liang, J. Huang, X. Yu and N. Zhu, *Chem. Eur. J.*, 2002, **8**, 1563-1572.
- 5 S. O'Sullivan, E. Doni, T. Tuttle and J. A. Murphy, *Angew. Chem., Int. Ed.*, 2014, **53**, 474-478.
- 6 P. S. Humphries, R. Bersot, J. Kincaid, E. Mabery, K. McCluskie, T. Park, T. Renner, E. Riegler, T. Steinfeld, E. D. Turtle, Z. Wei and E. Willis, *Bioorg. Med. Chem. Lett.*, 2016, **26**, 757-760.
- 7 T. Oshima, I. Yamanaka, A. Kumar, J. Yamaguchi, T. Nishiwaki-Ohkawa, K. Muto, R. Kawamura, T. Hirota, K. Yagita and S. Irle, *Angew. Chem., Int. Ed.*, 2015, **127**, 7306-7306.
- 8 S. Renner, W. A. L. Van Otterlo, M. Dominguez Seoane, S. M<sup>o</sup>Cklinghoff, B. Hofmann, S. Wetzell, A. Schuffenhauer, P. Ertl, T. I. Oprea and D. Steinhilber, *Nat. Chem. Bio.*, 2009, **5**, 585-592.
- 9 C. Buathongjan, D. Beukeaw and S. Yotphan, *Eur. J. Org. Chem.*, 2015, **2015**, 1575-1582.
- 10 A. S. Madsen, H. M. E. Kristensen, G. Lanz and C. A. Olsen, *Chemmedchem*, 2014, **9**, 672-672.
- 11 R. Sridhar, B. Srinivas, V. P. Kumar, M. Narender and K. R. Rao, *ChemInform*, 2010, **38**, 1873-1876.
- 12 M. C. B. Jaimes, V. Weingand, F. Rominger and A. S. K. Hashmi, *Chem. Eur. J.*, 2013, **9**, 12504-12511.
- 13 H. Song, Y. Liu, Y. Liu and Q. Wang, *Org. Lett.*, 2014, **16**, 3240-3243.
- 14 S-Y. Moom, J. Nam, K. Rathwell and W-O. Kim, *Org. Lett.*, 2014, **16**, 338-341.

## 7. NMR spectra of products

3a

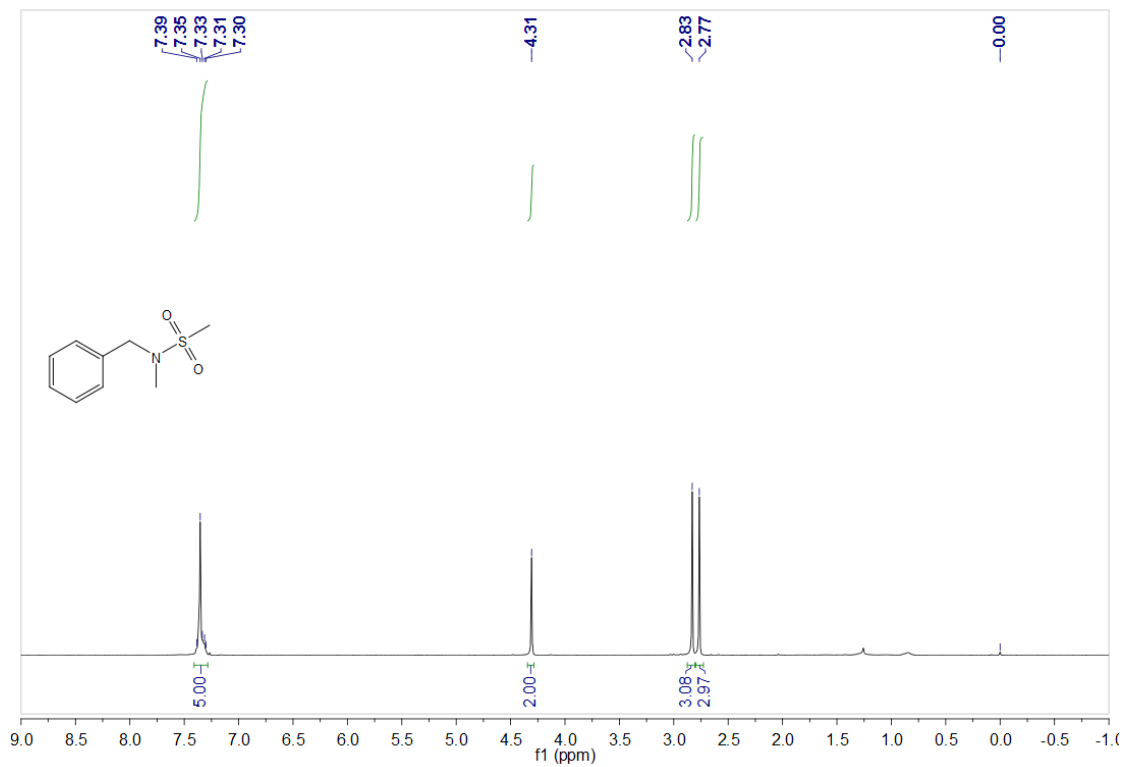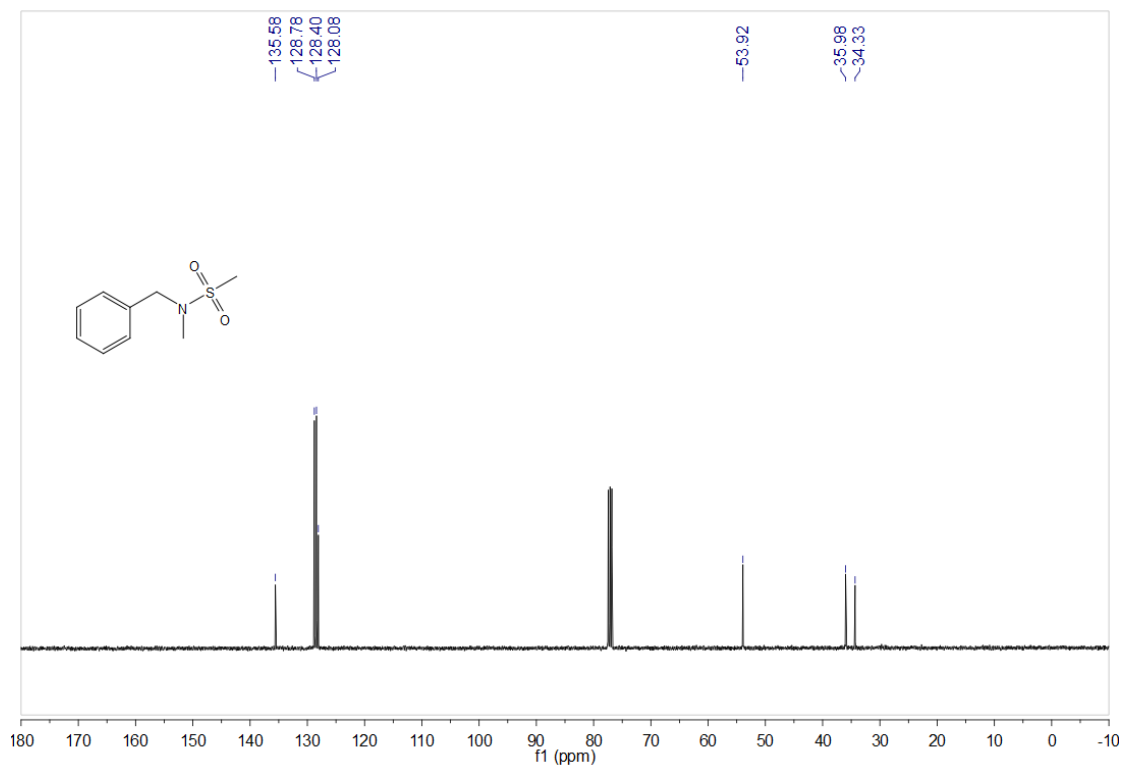

3b

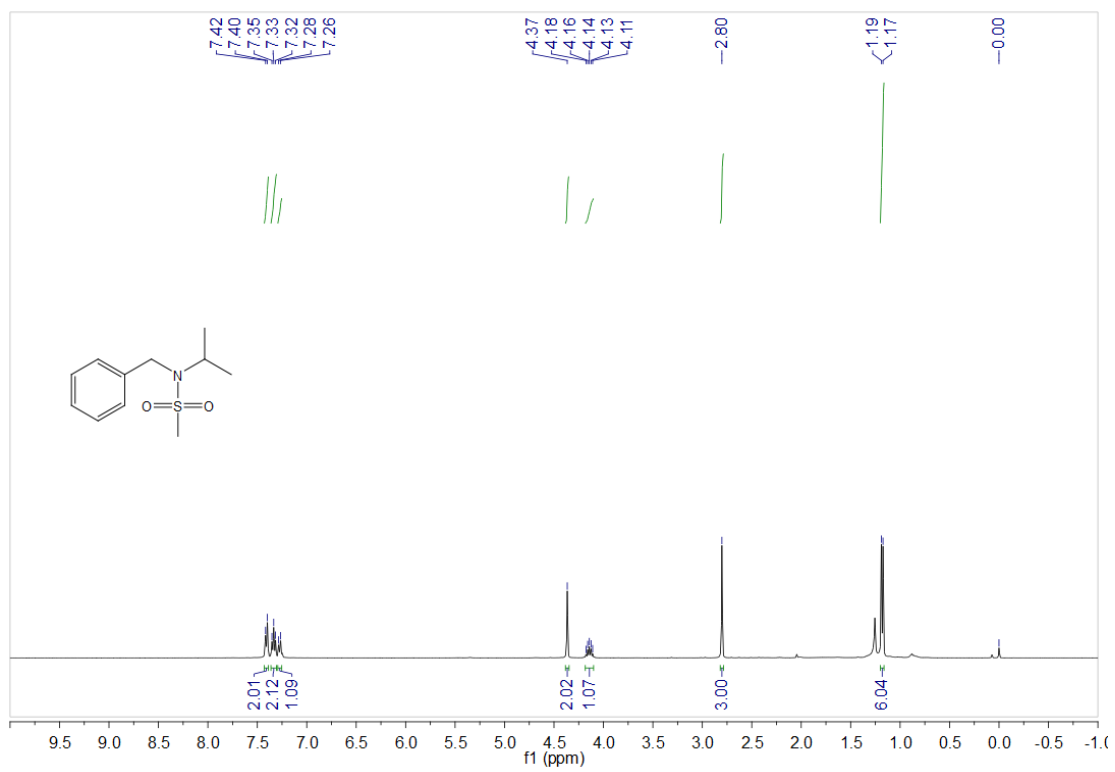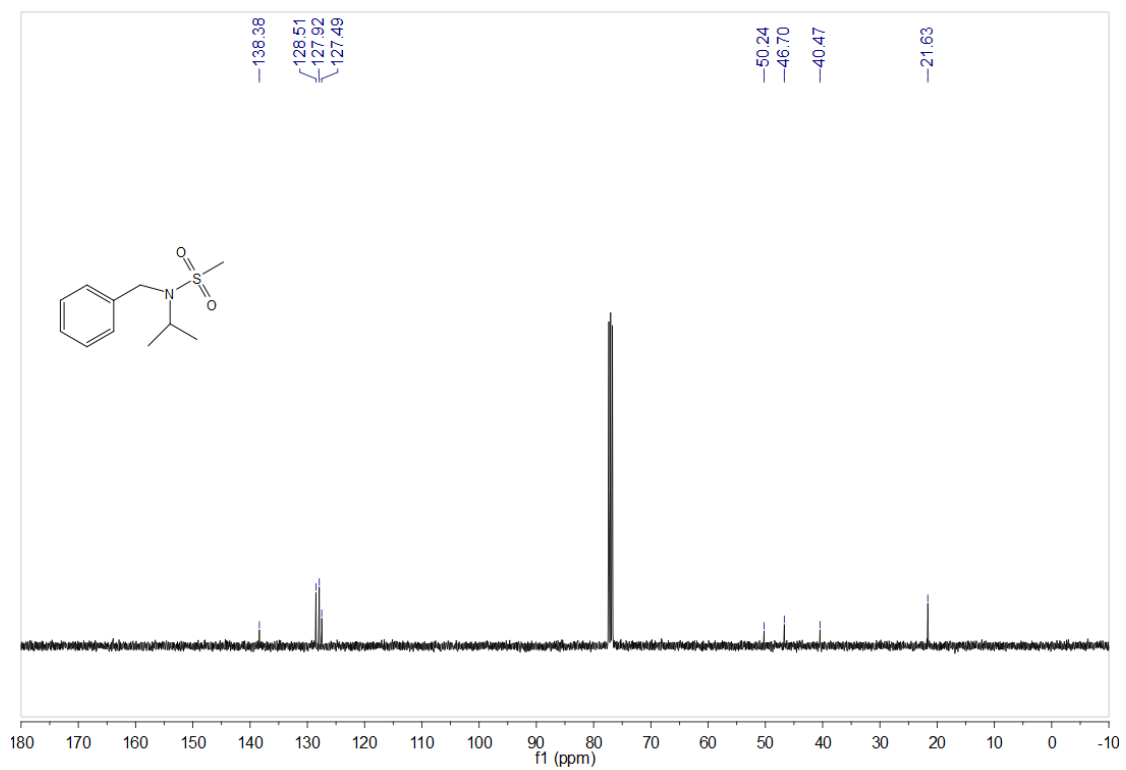

3c

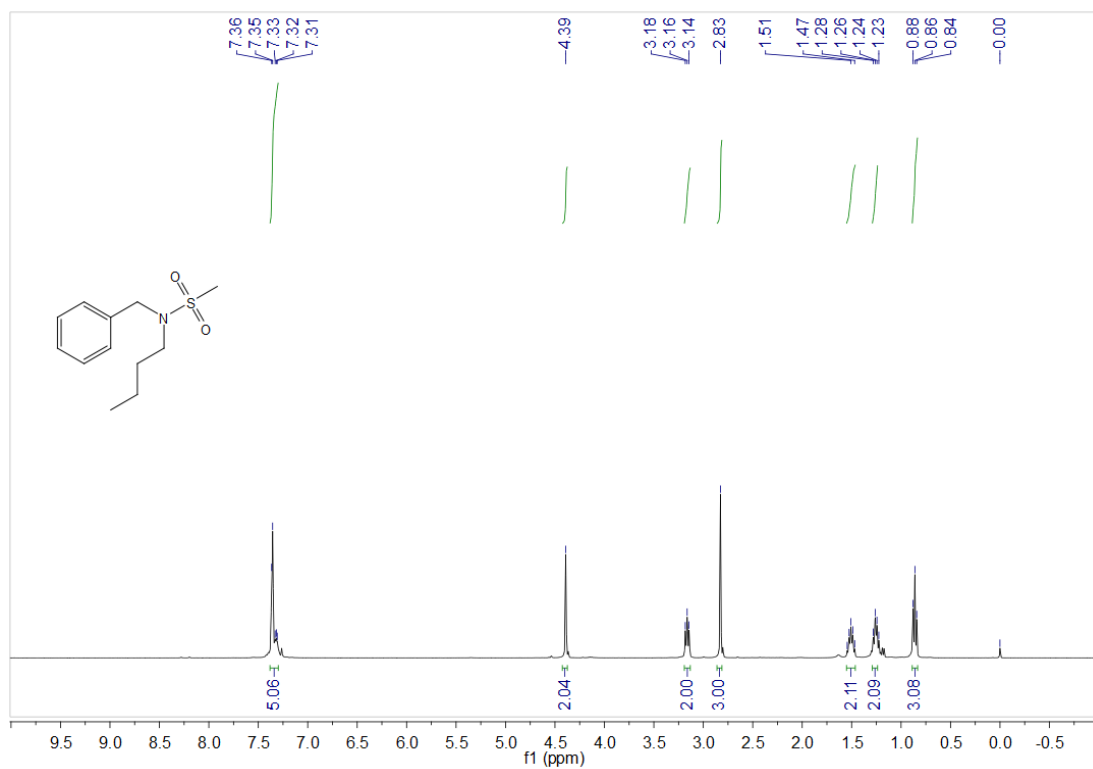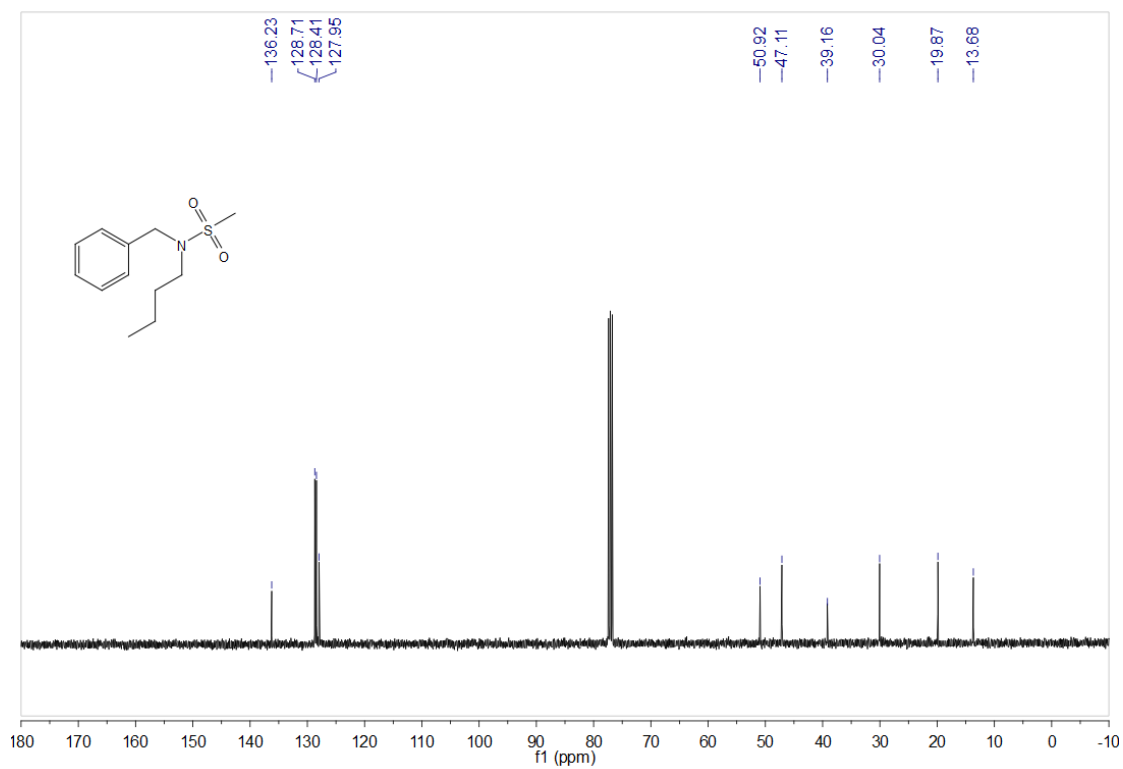

3d

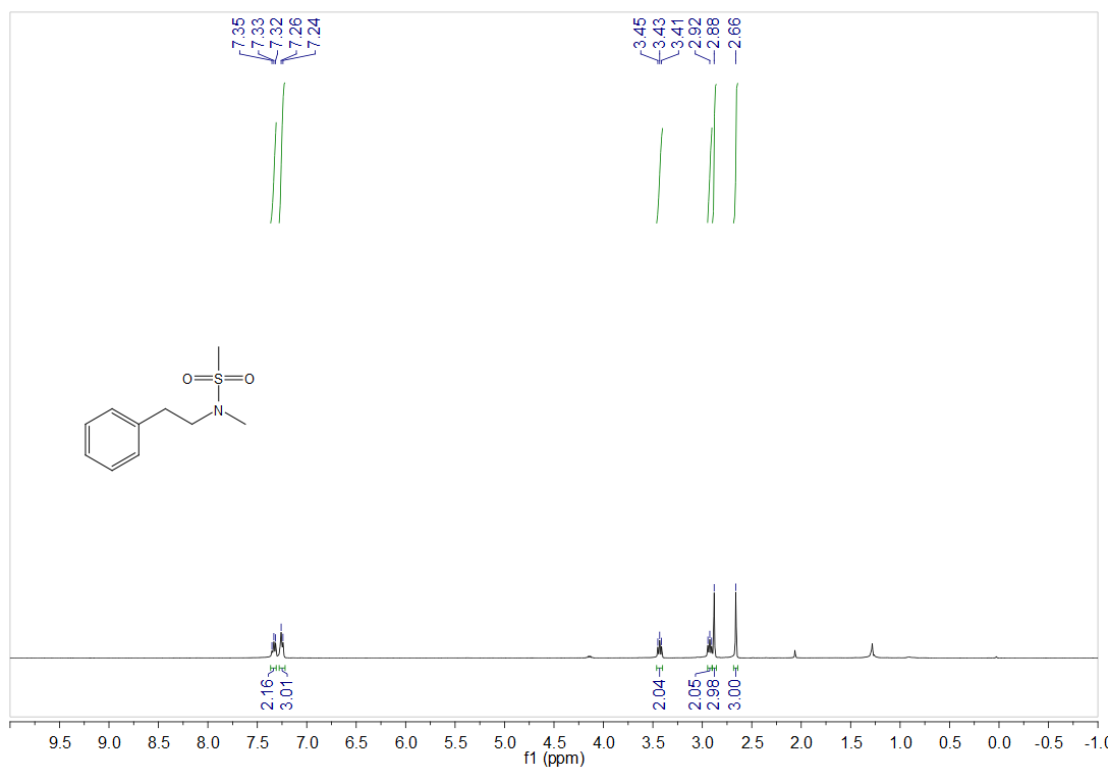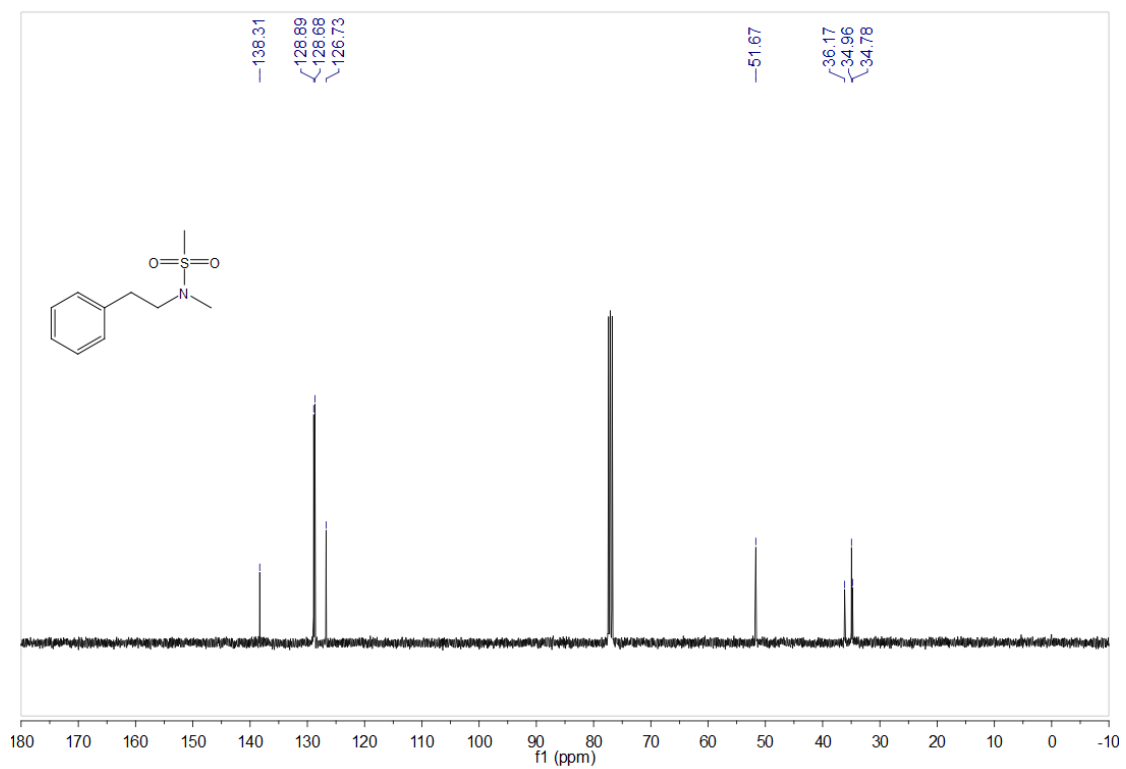

3e

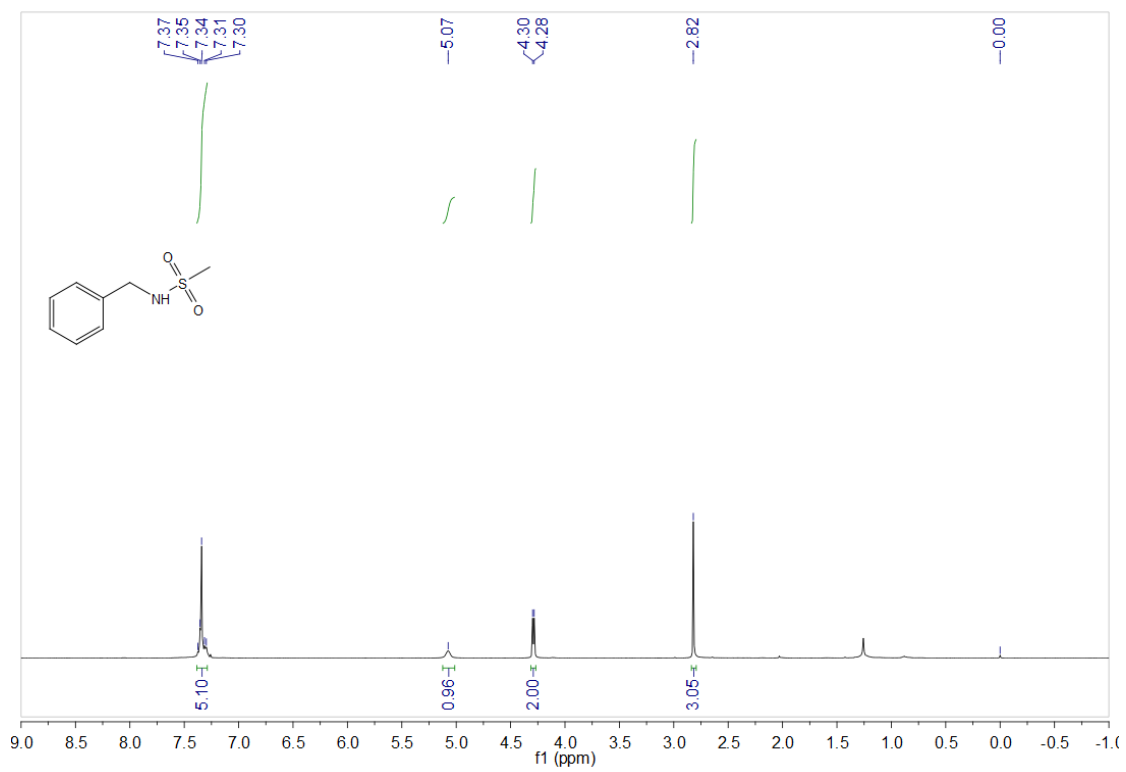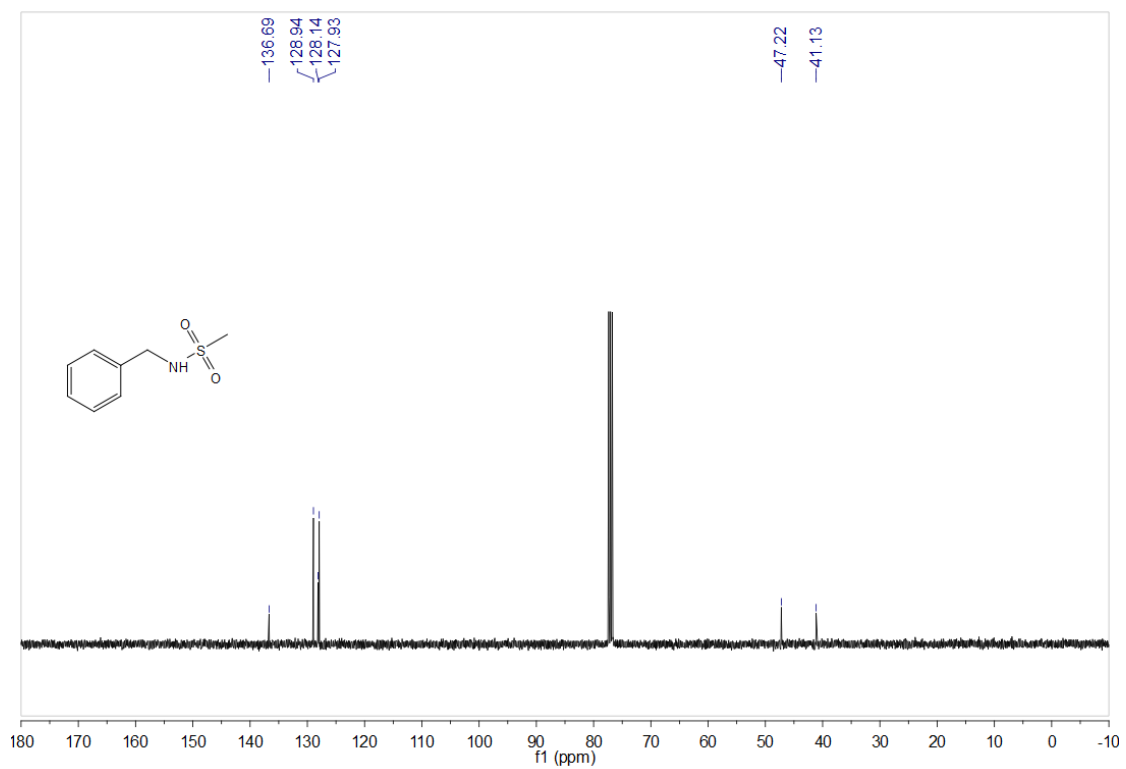

3f

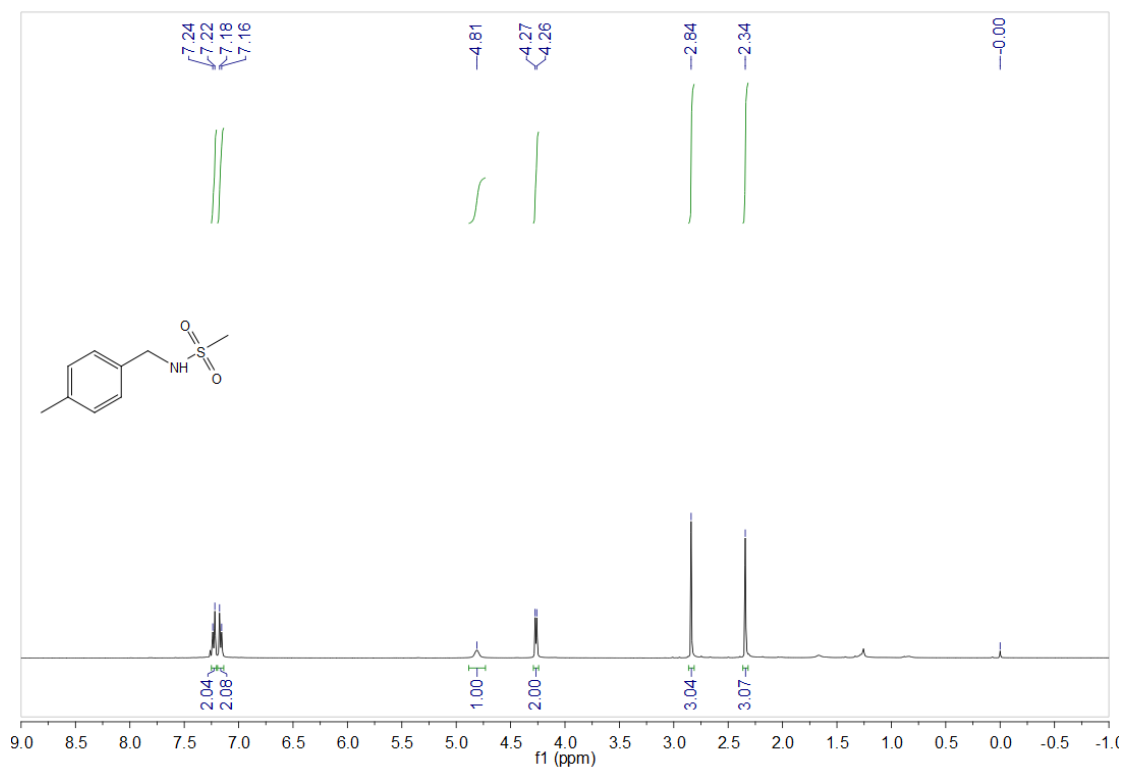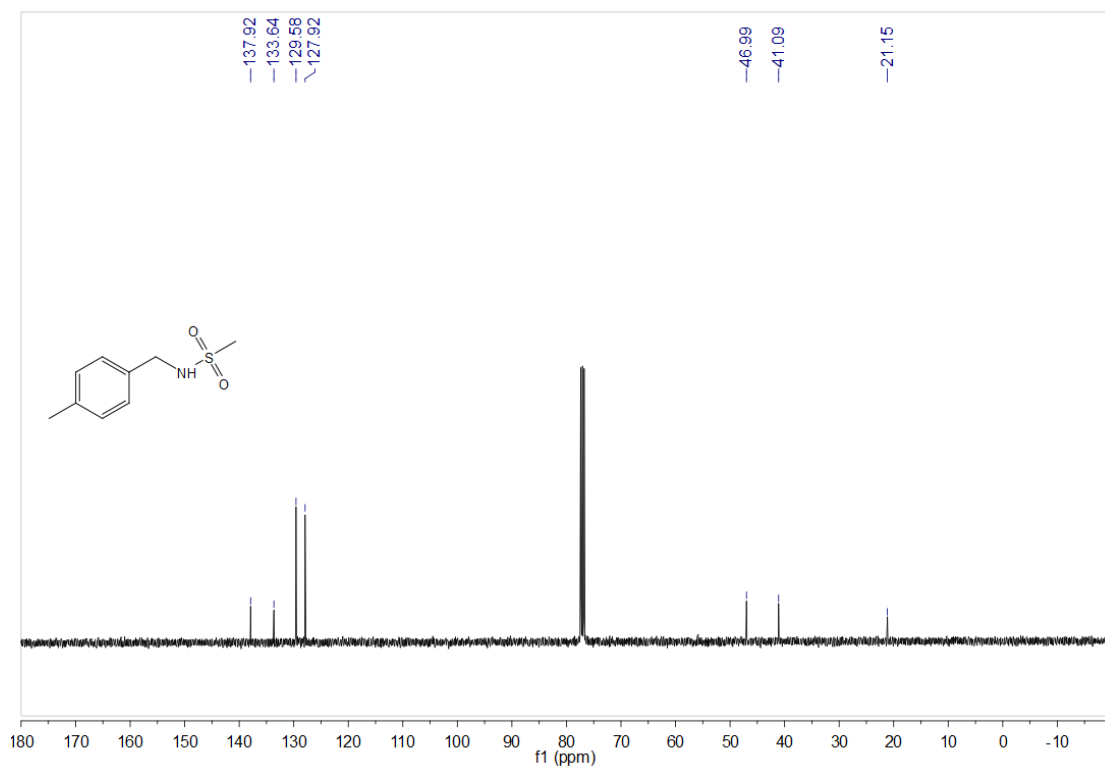



3g

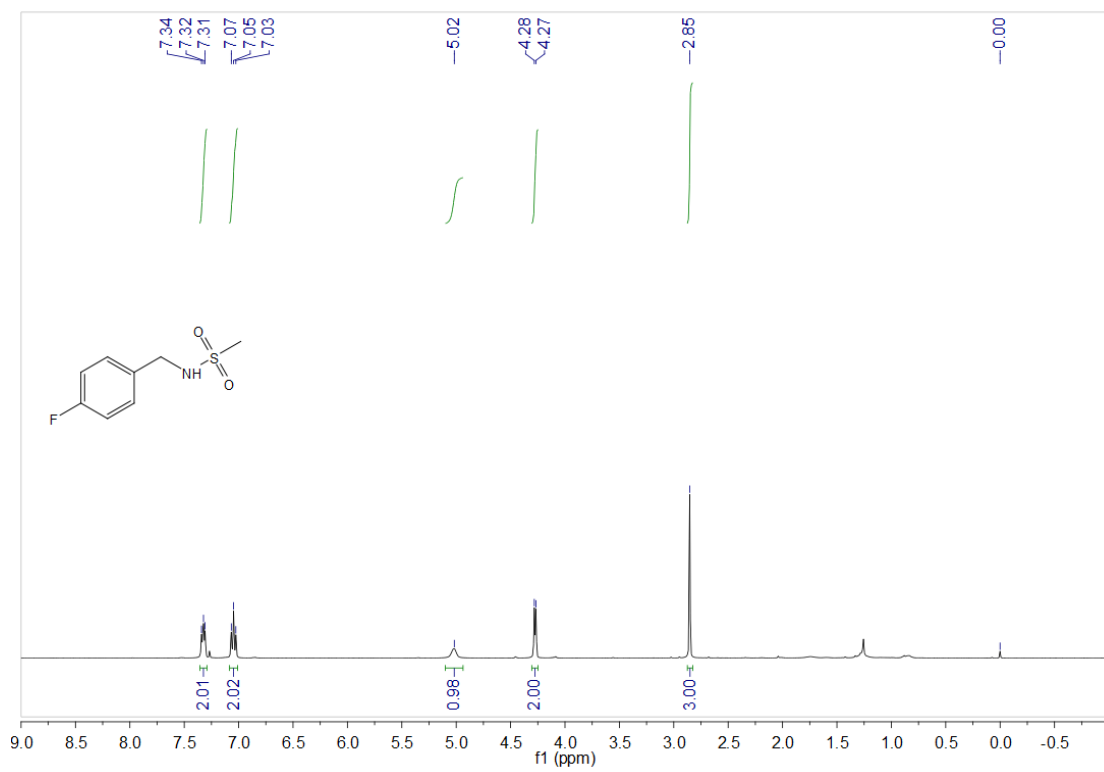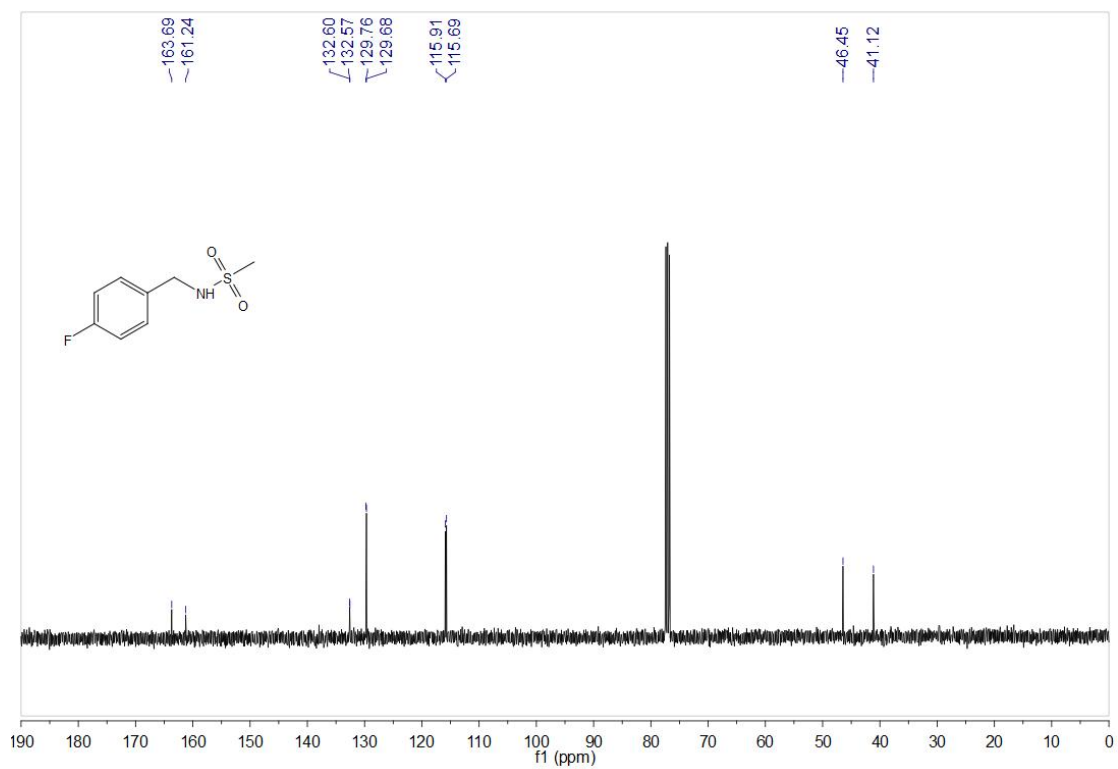

3h

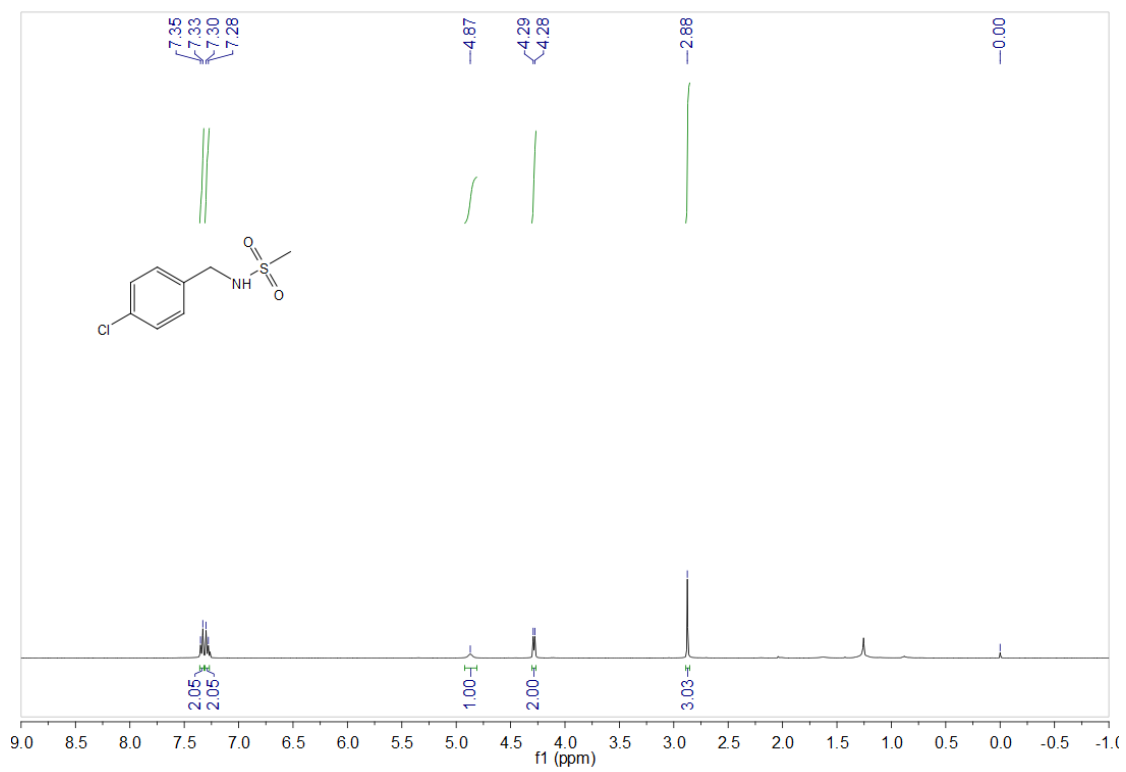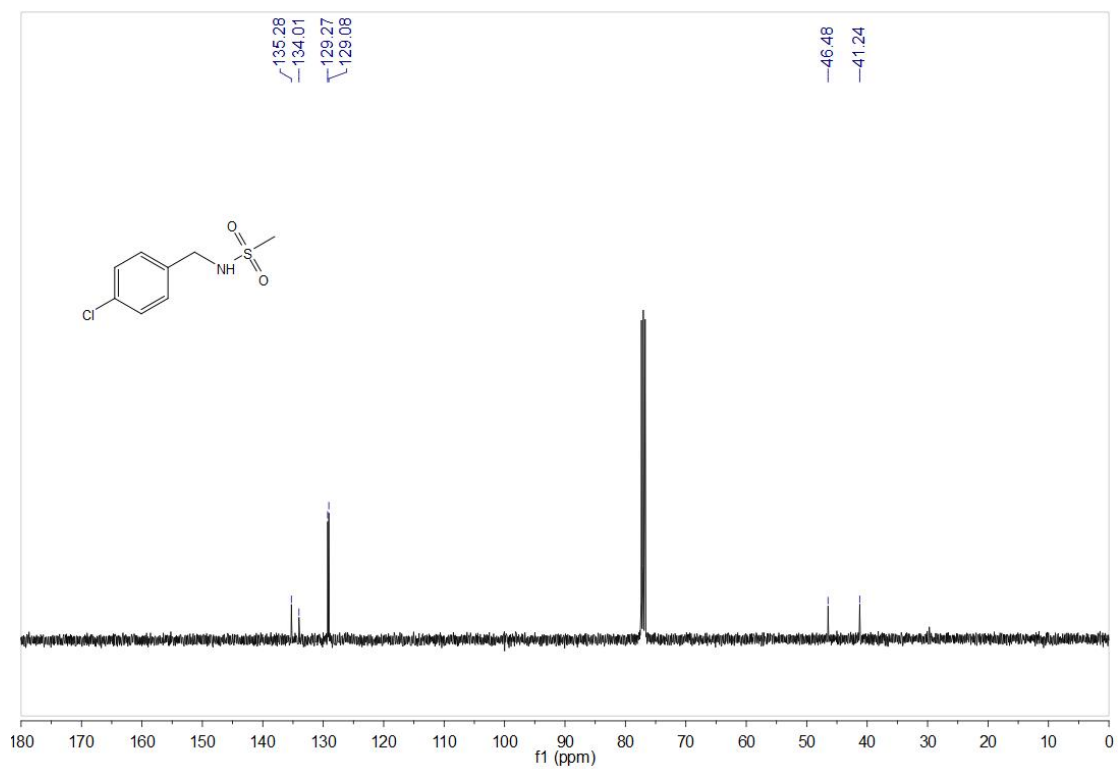

3i

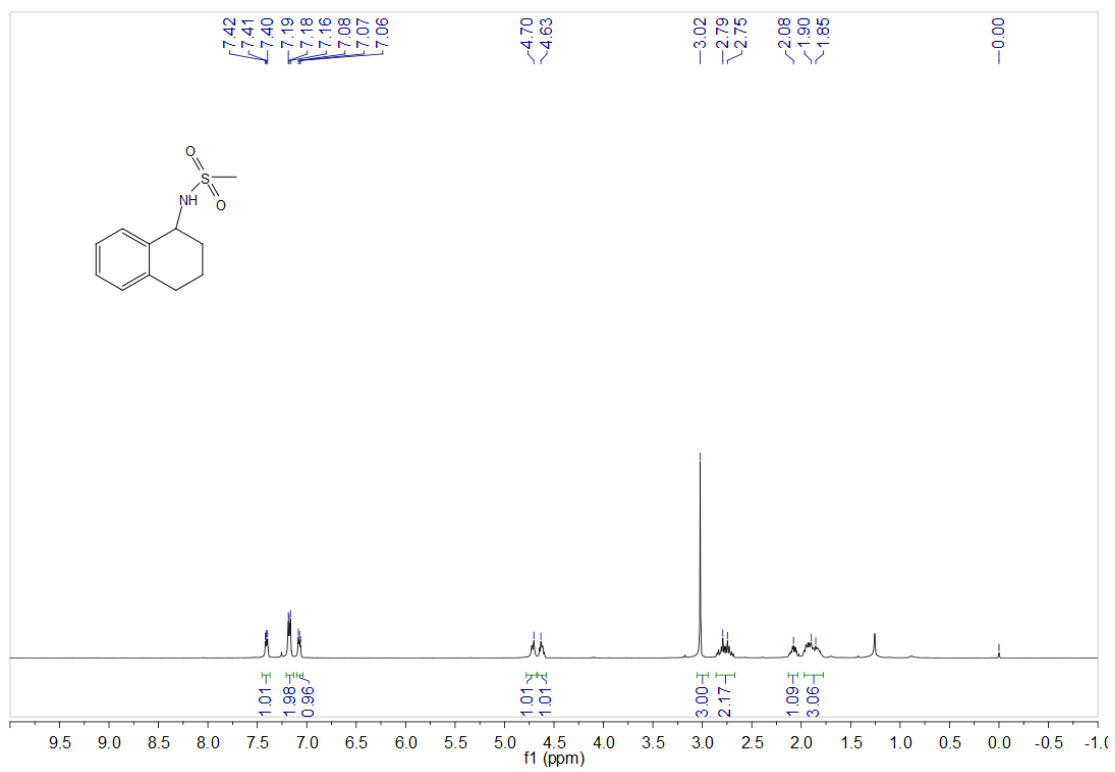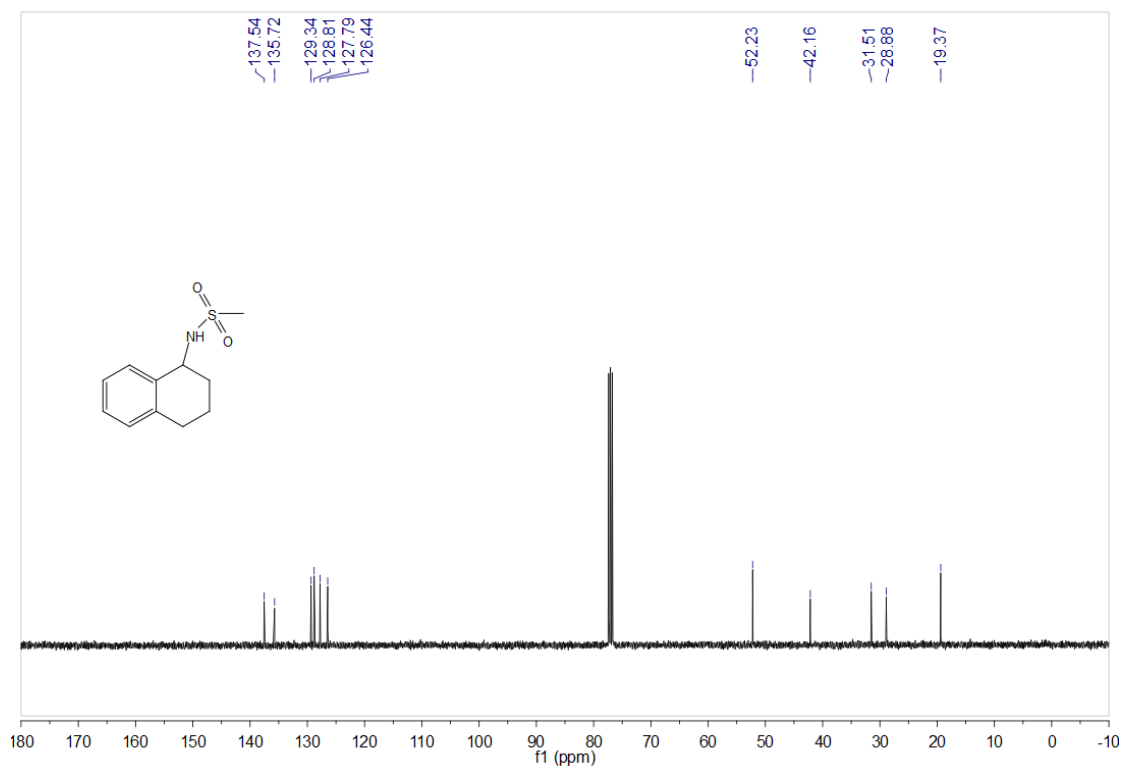

3j

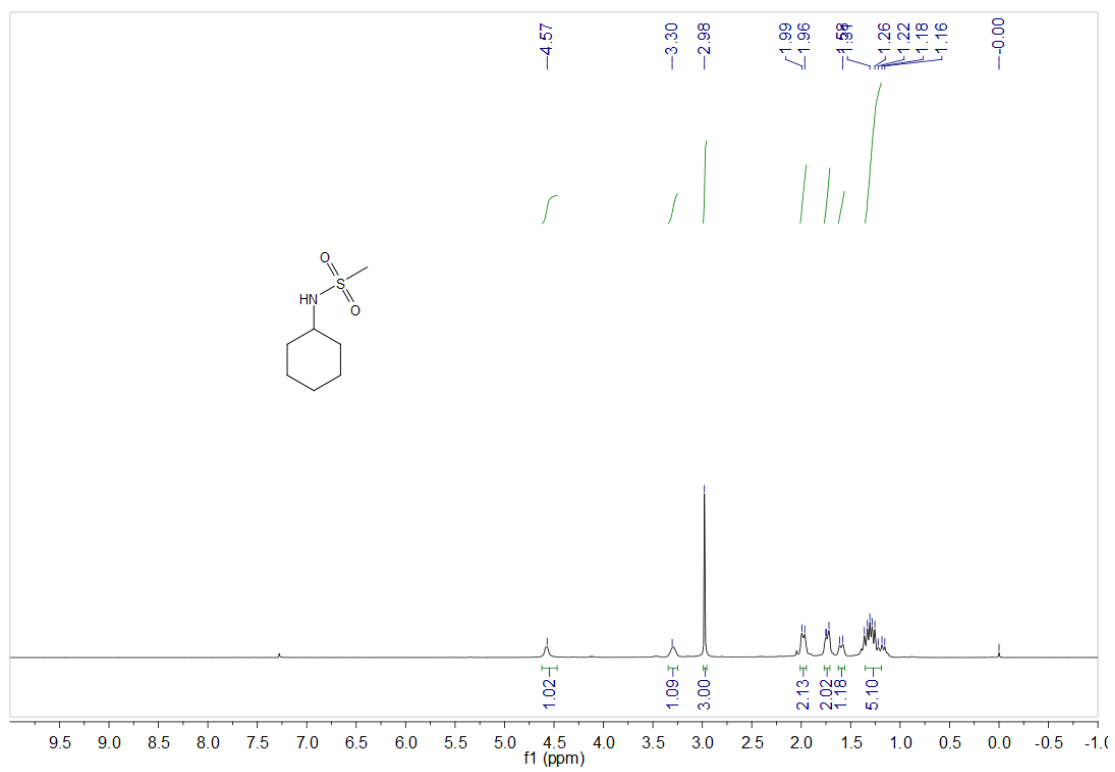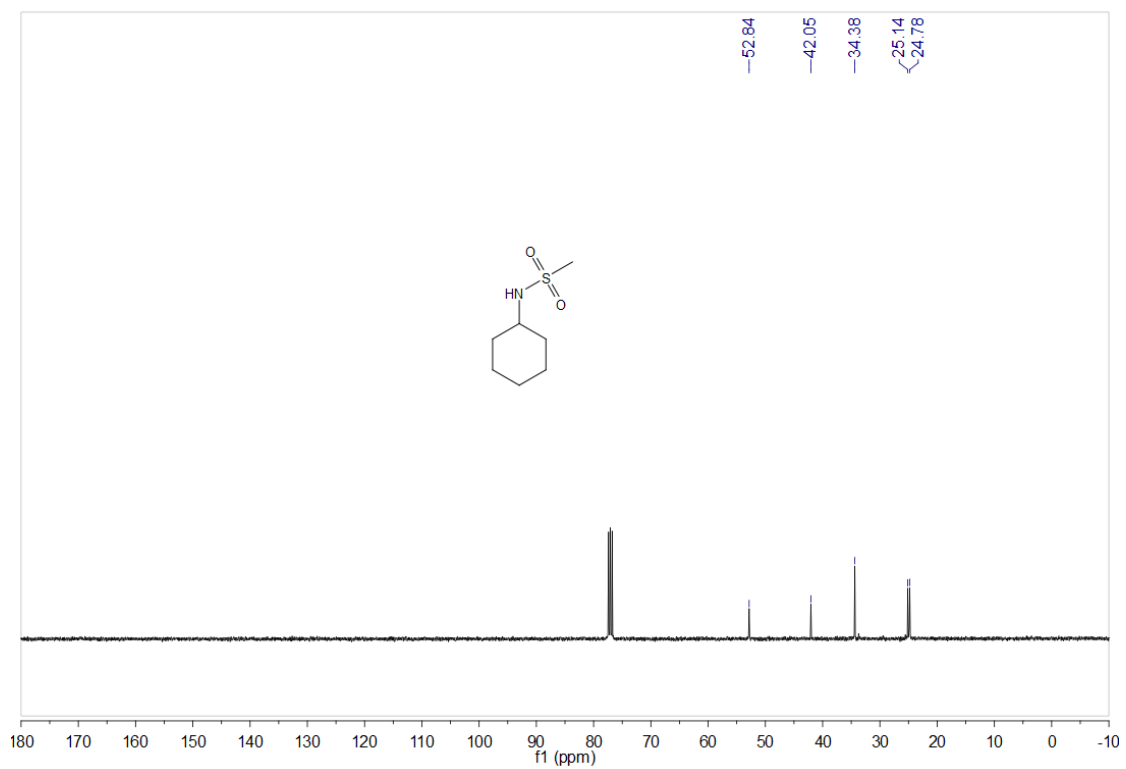

3k

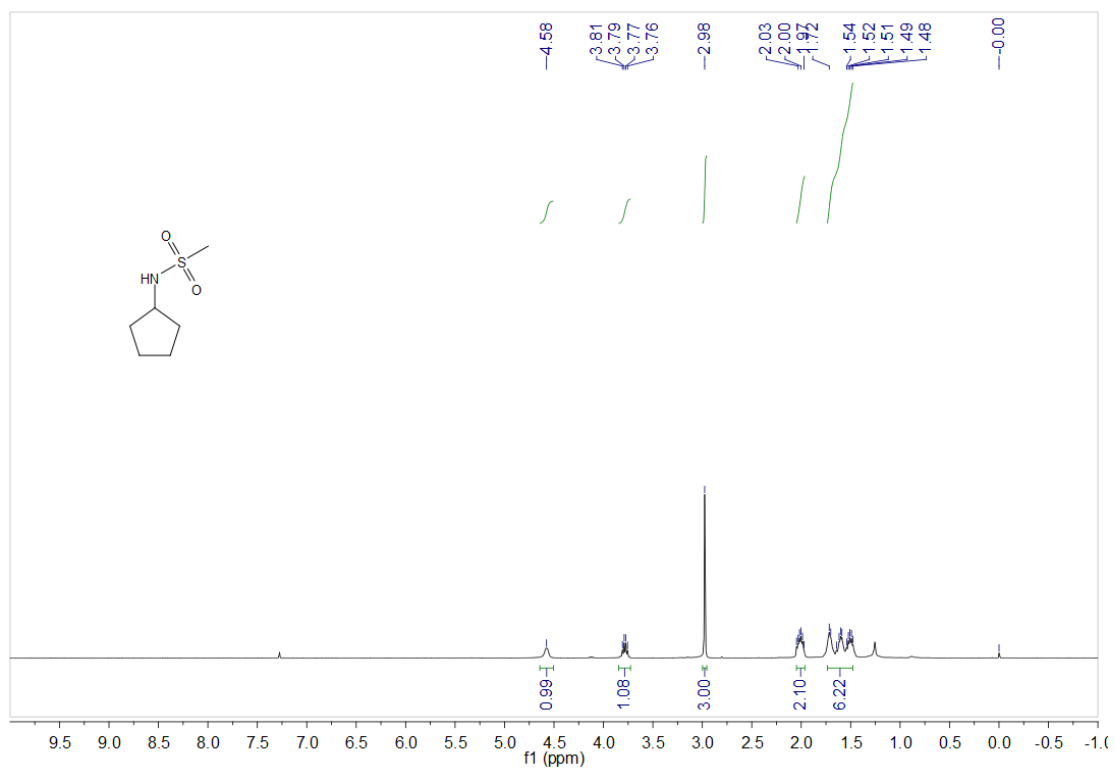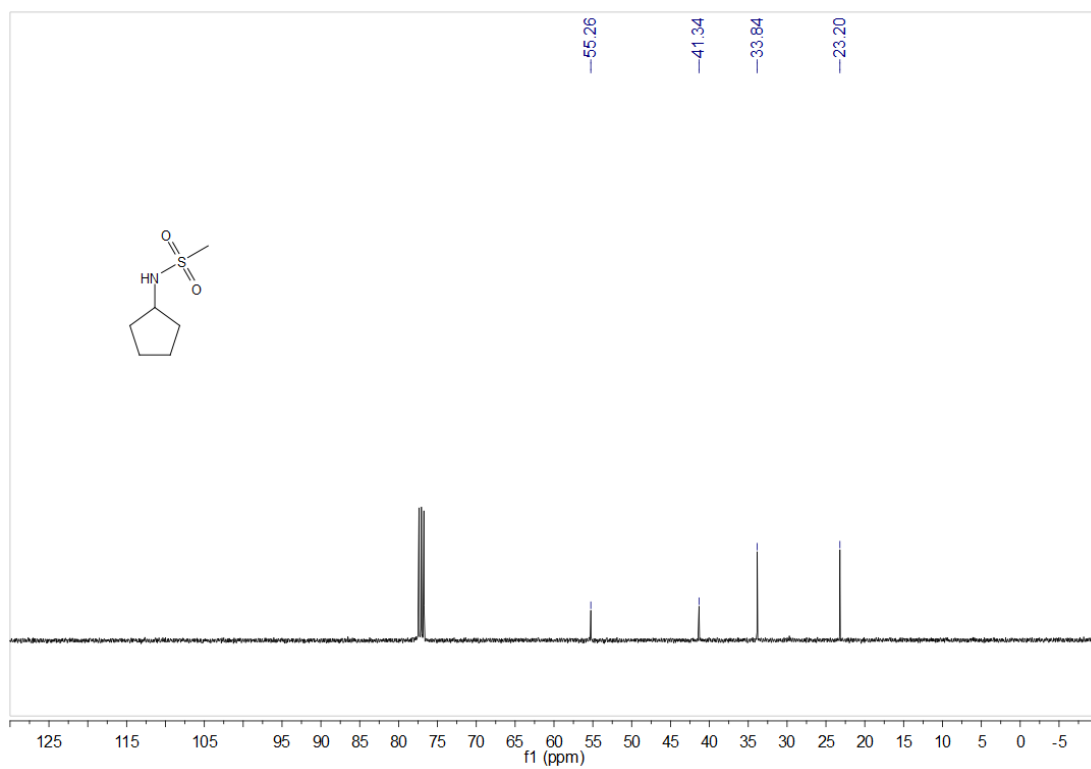

31

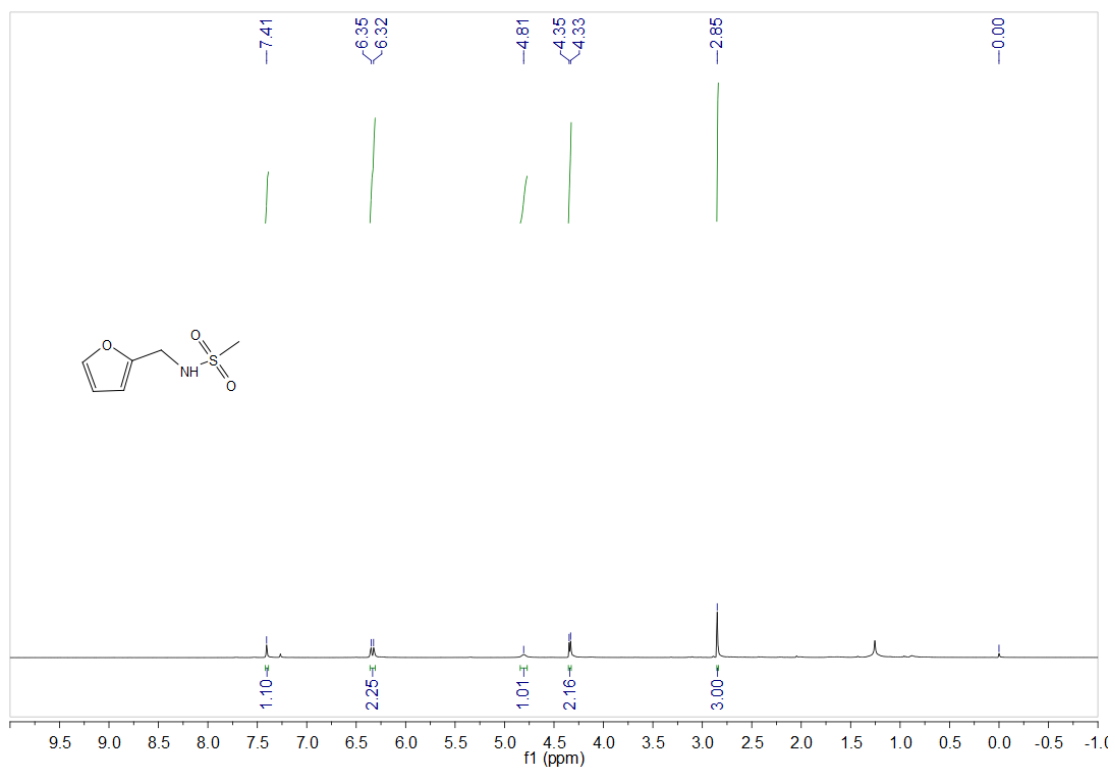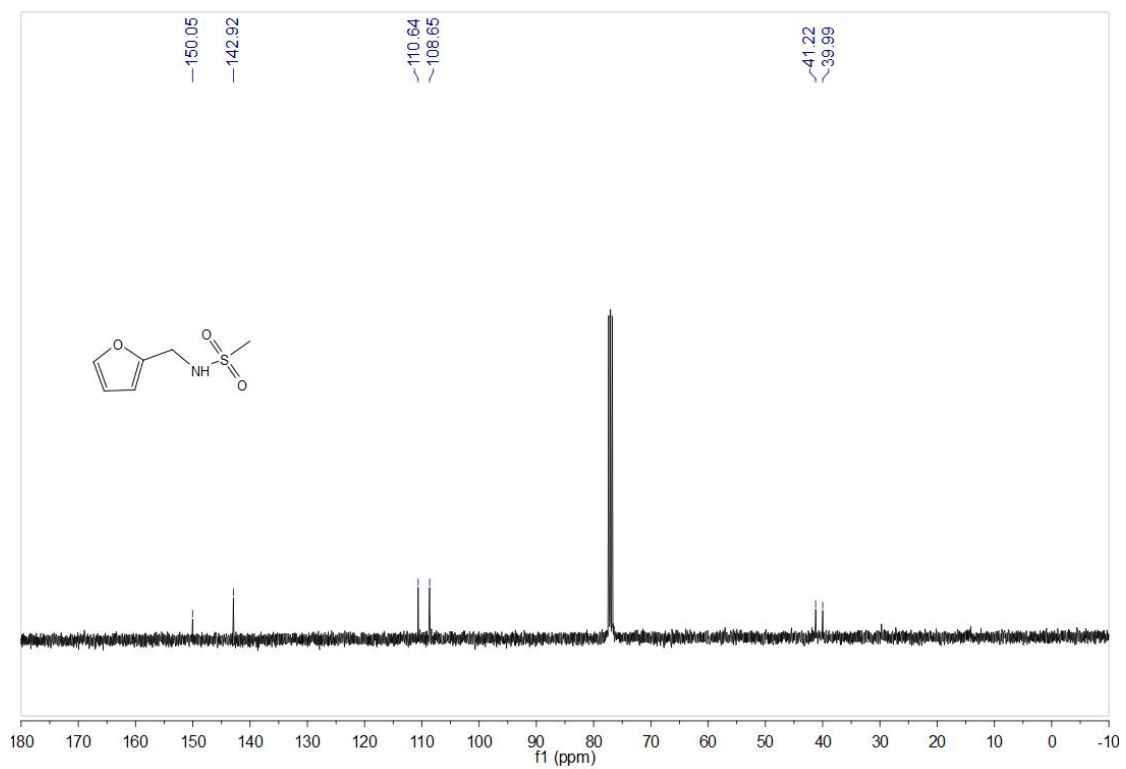

3m

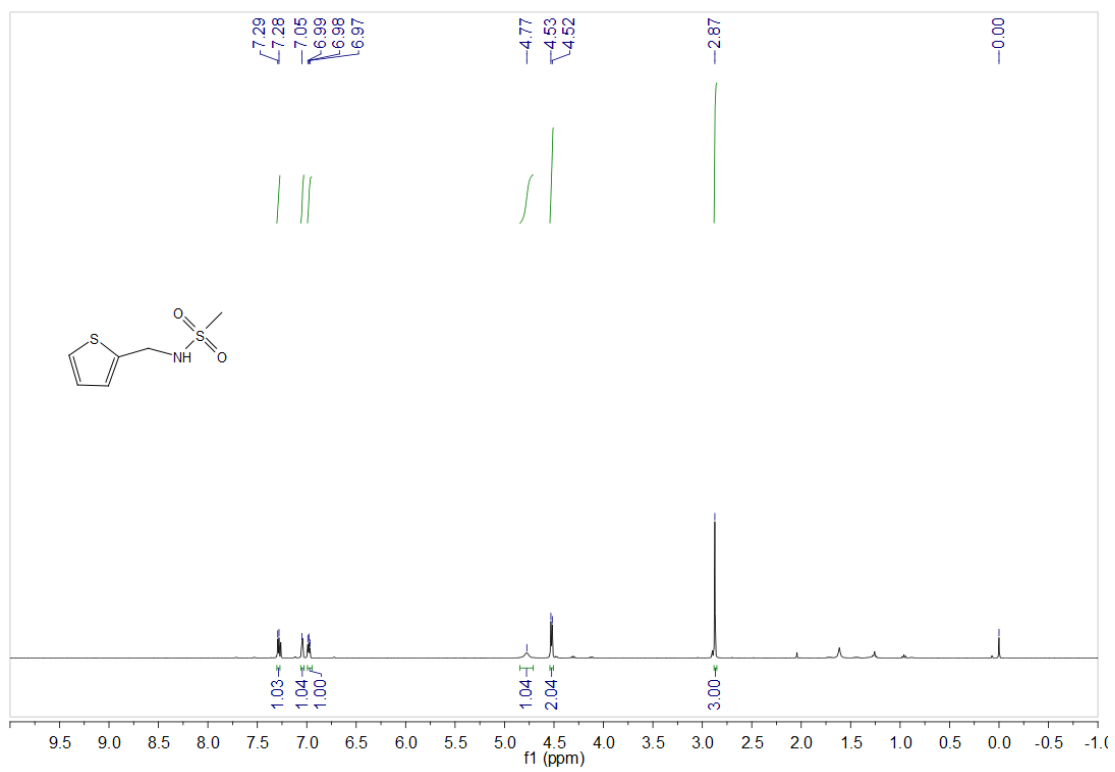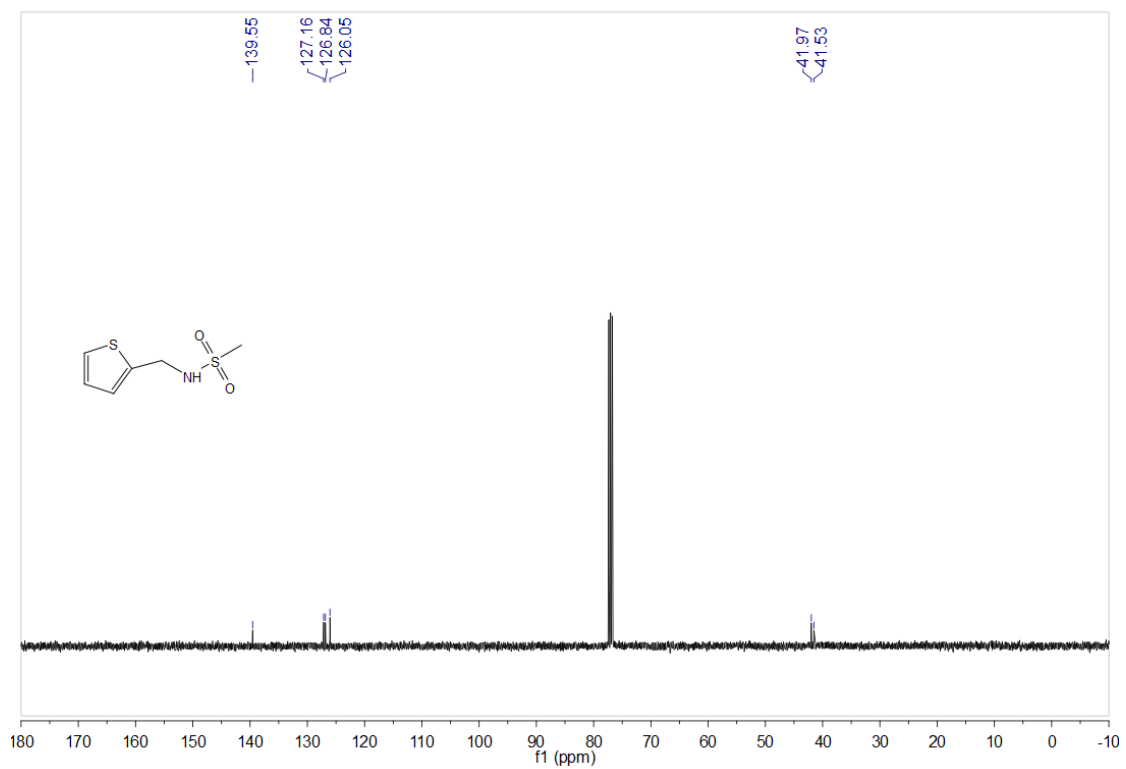

3n

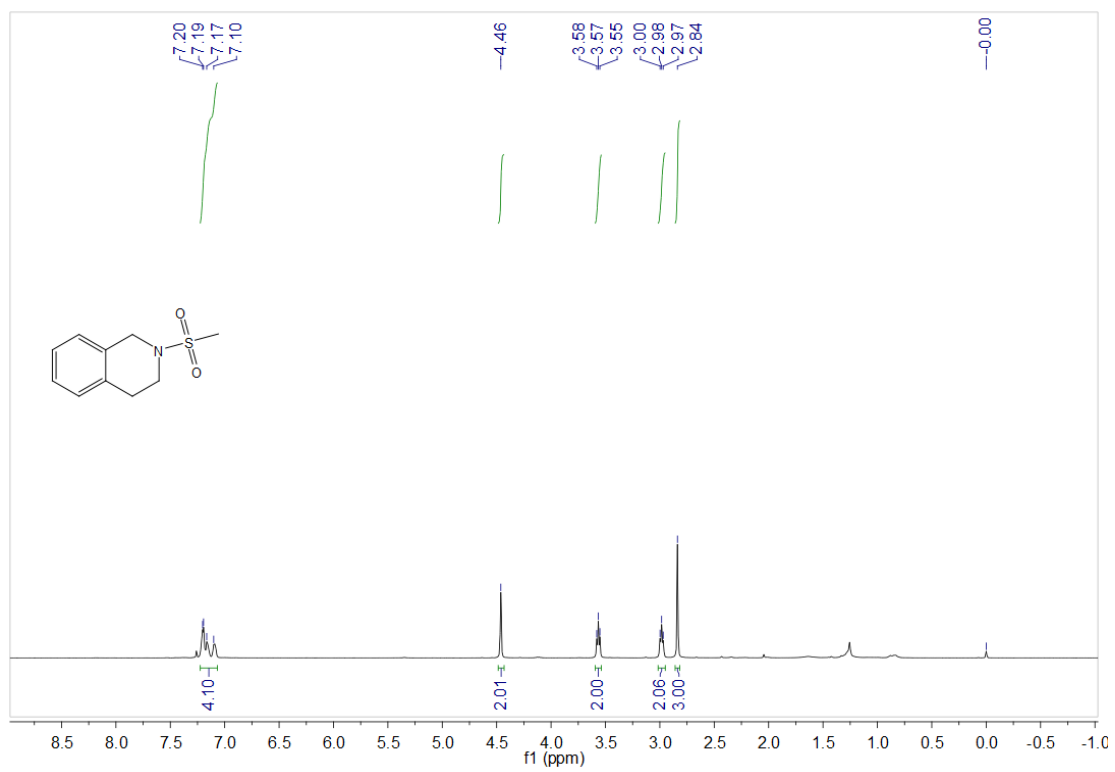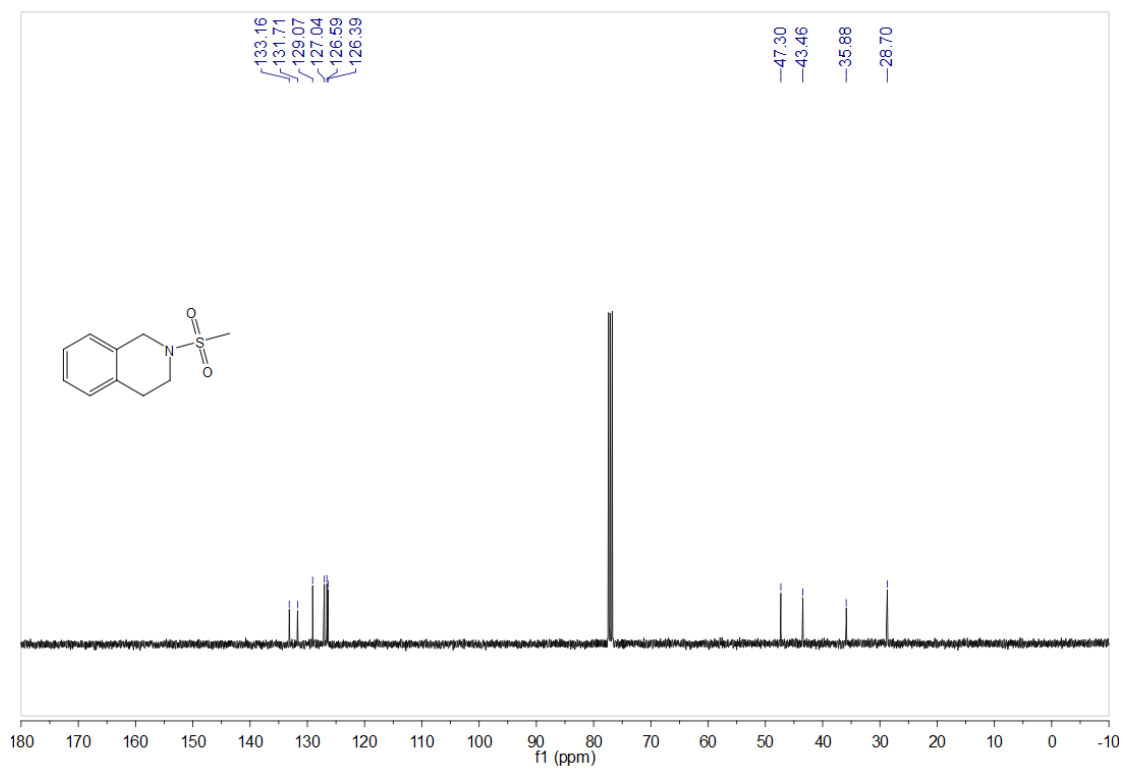



3o

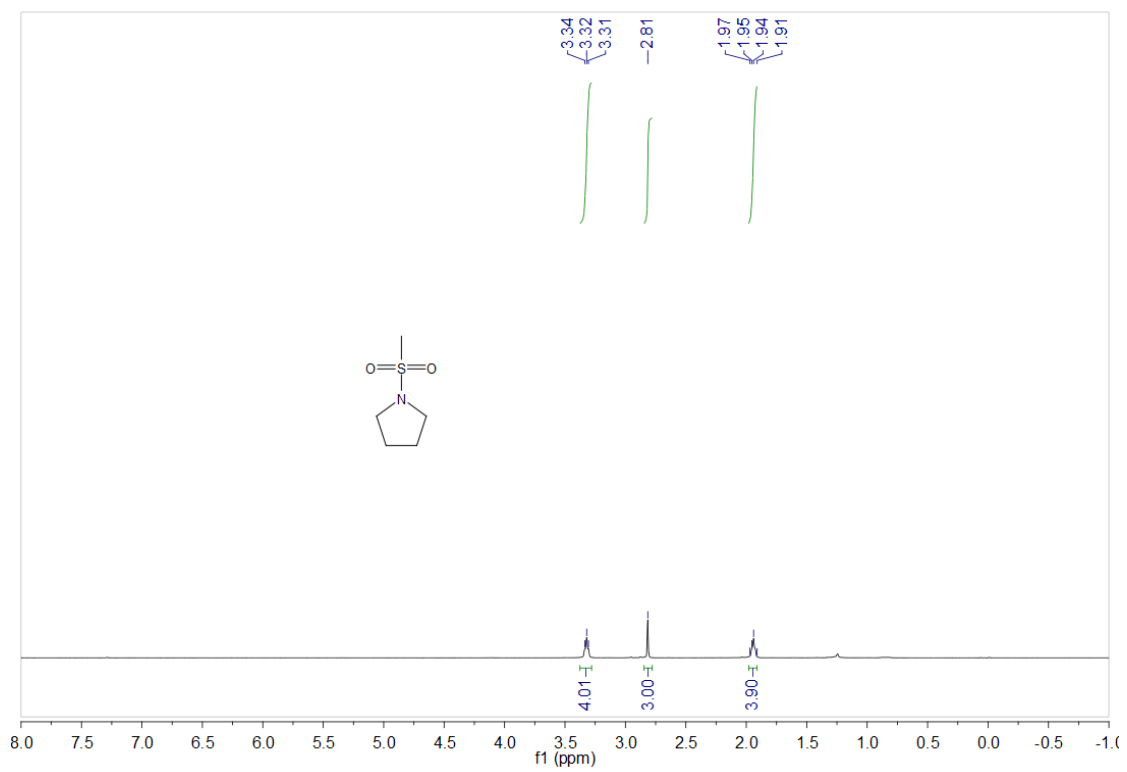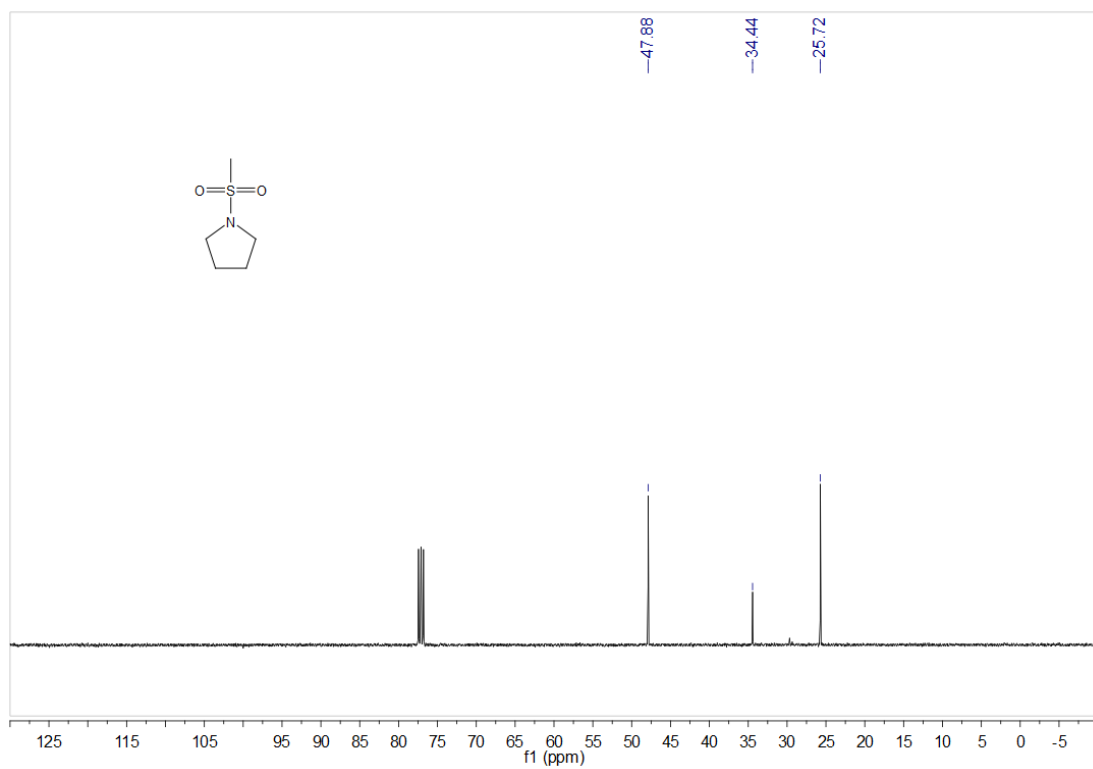

3p

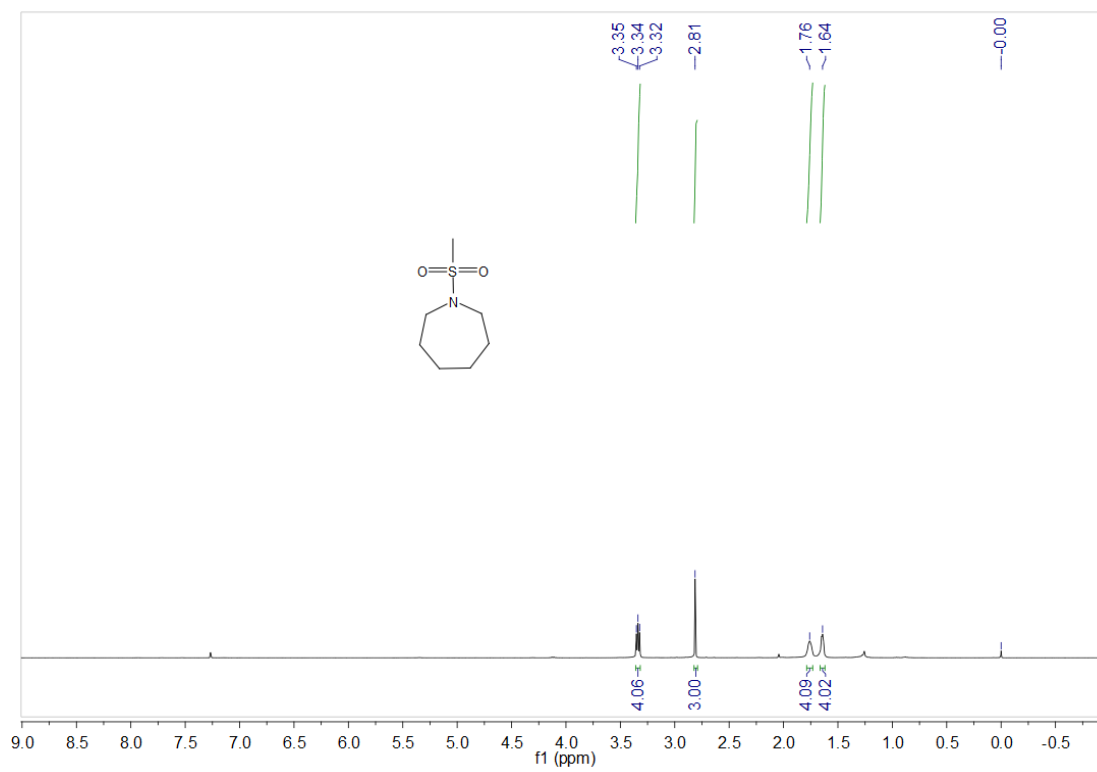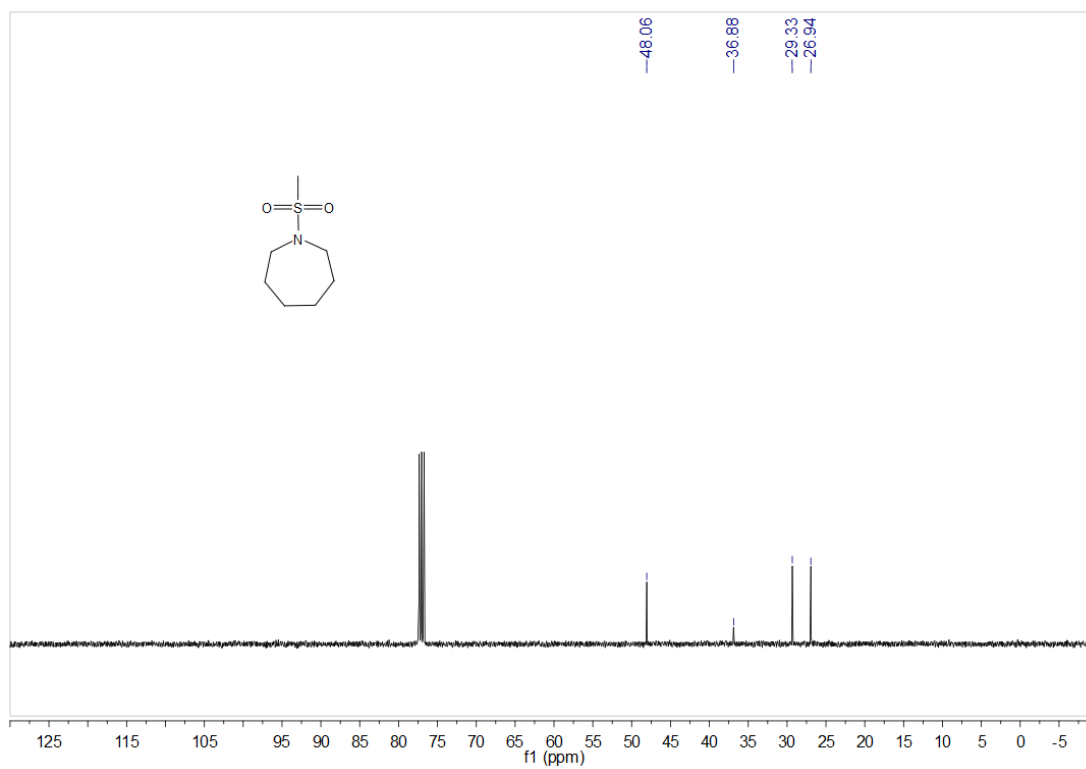

3q

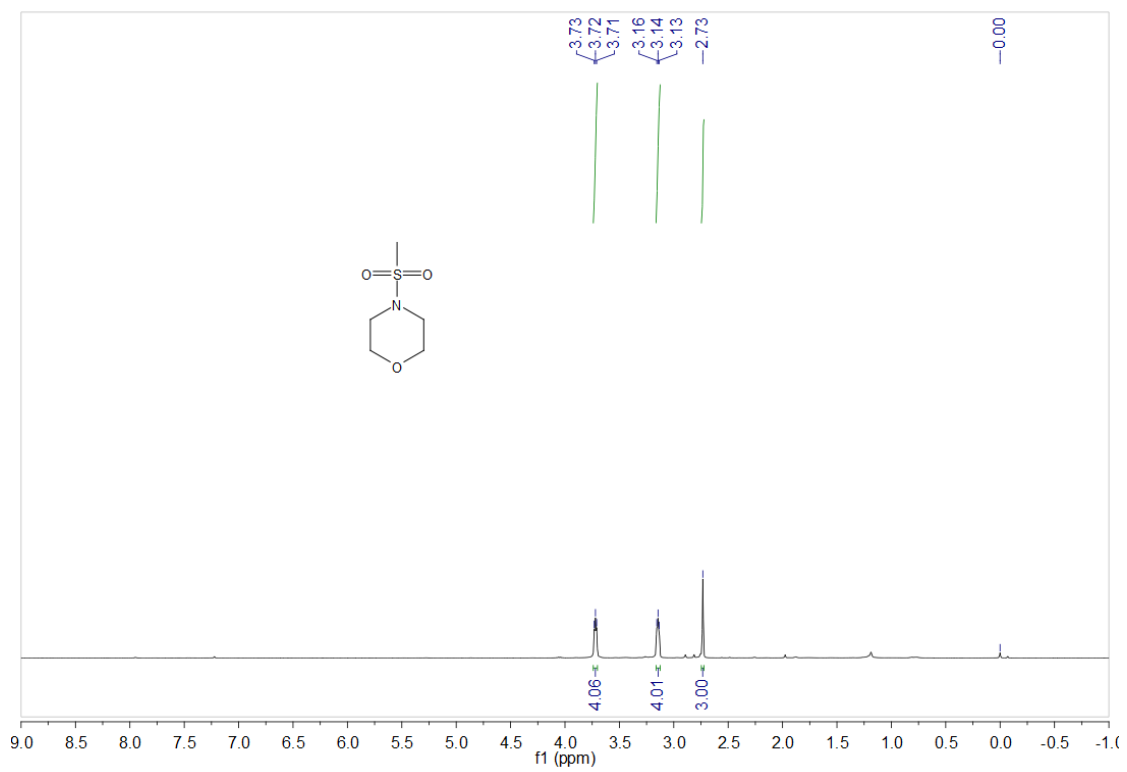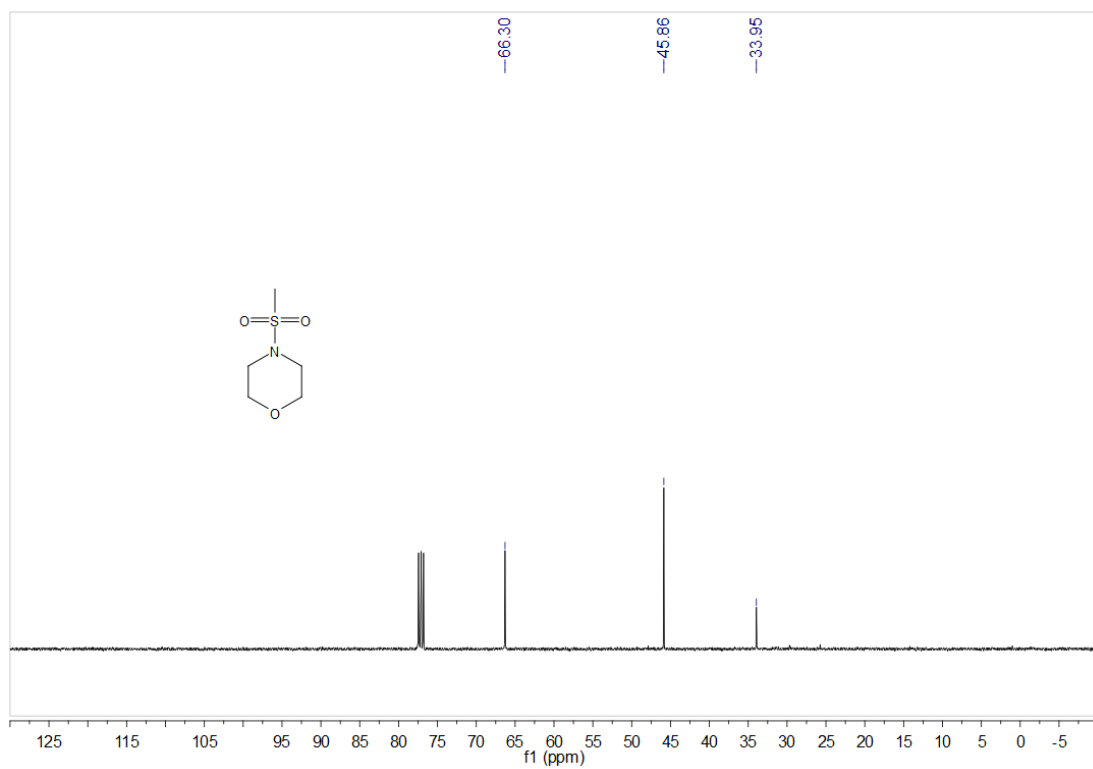

3r

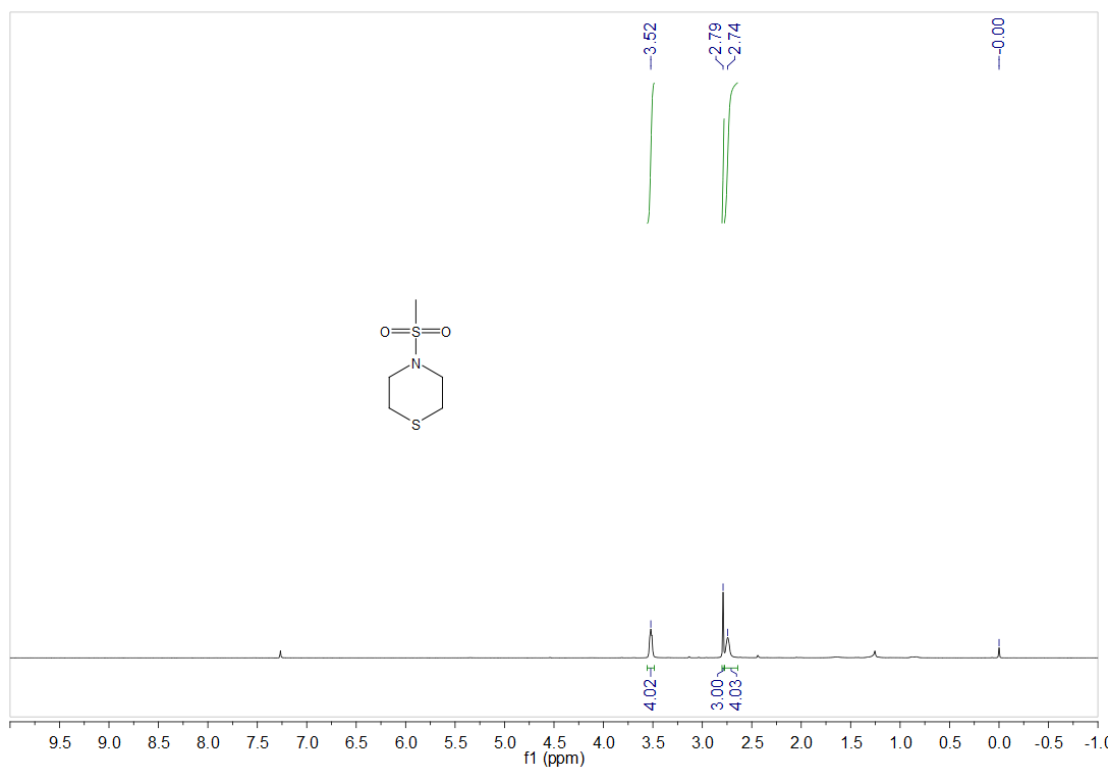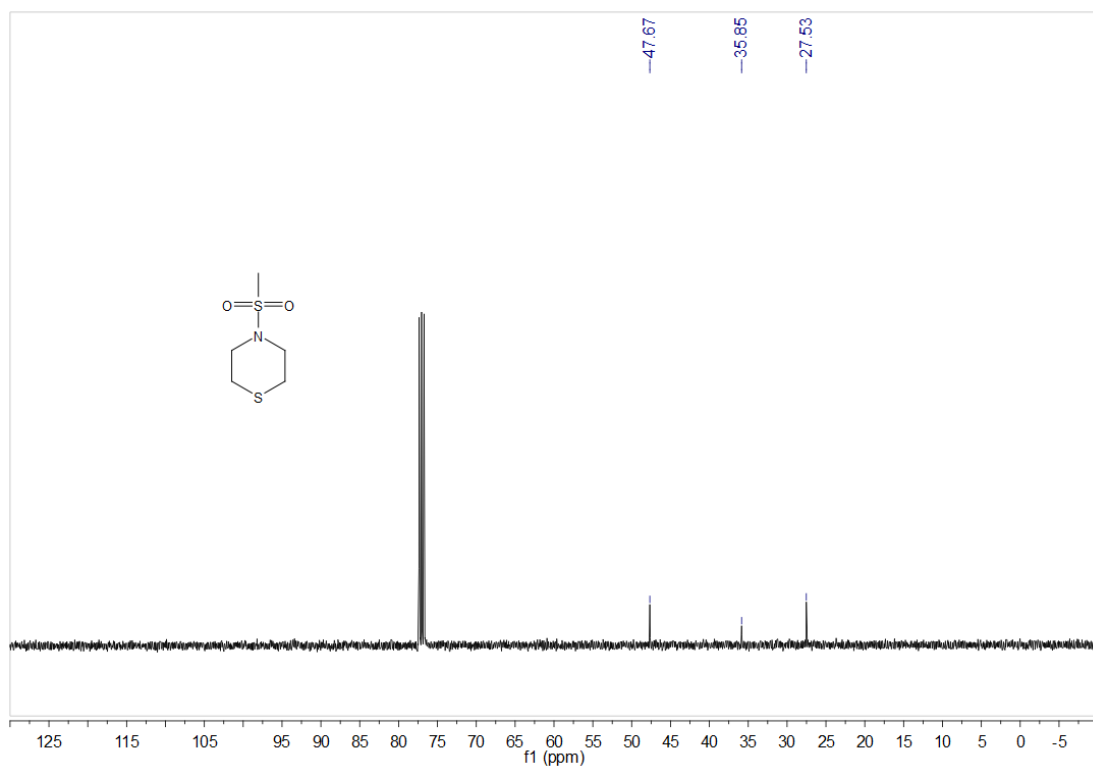

3s

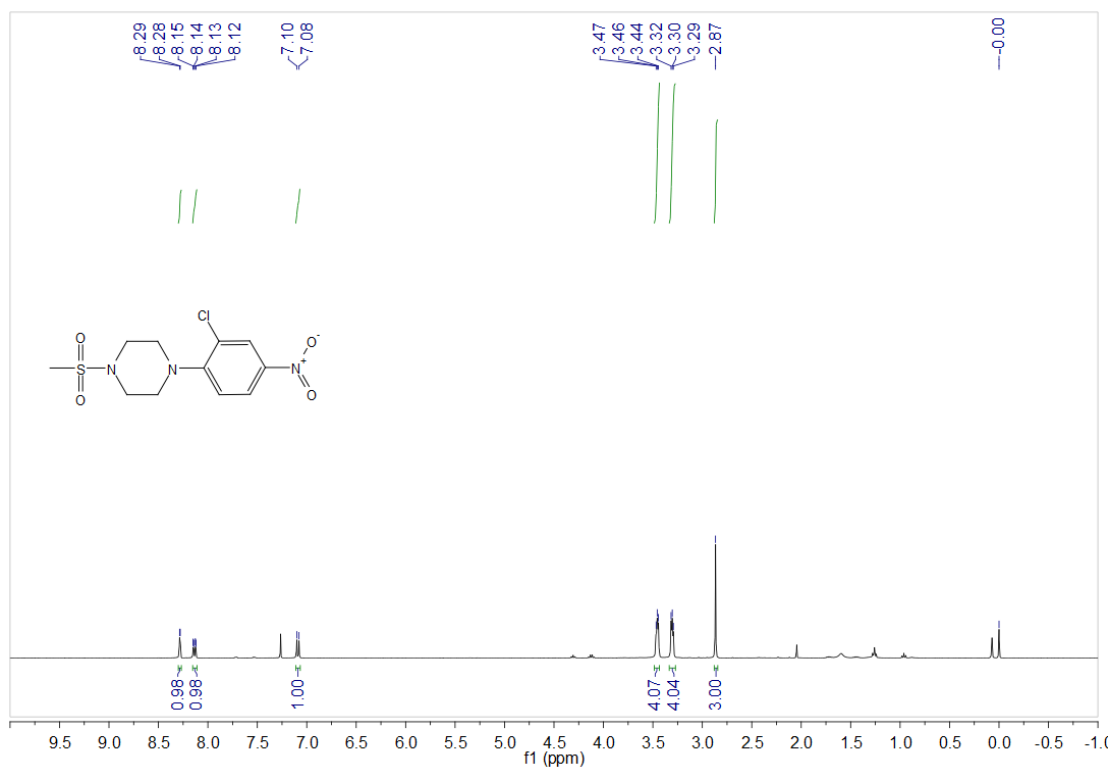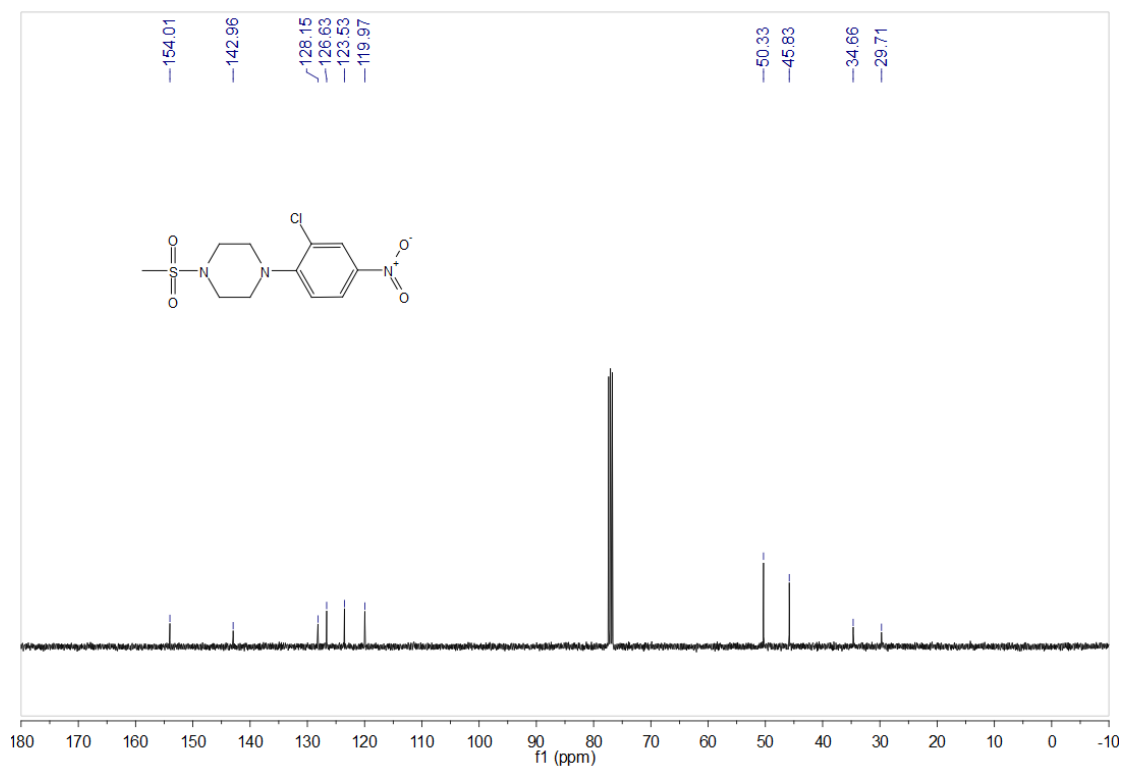

3t

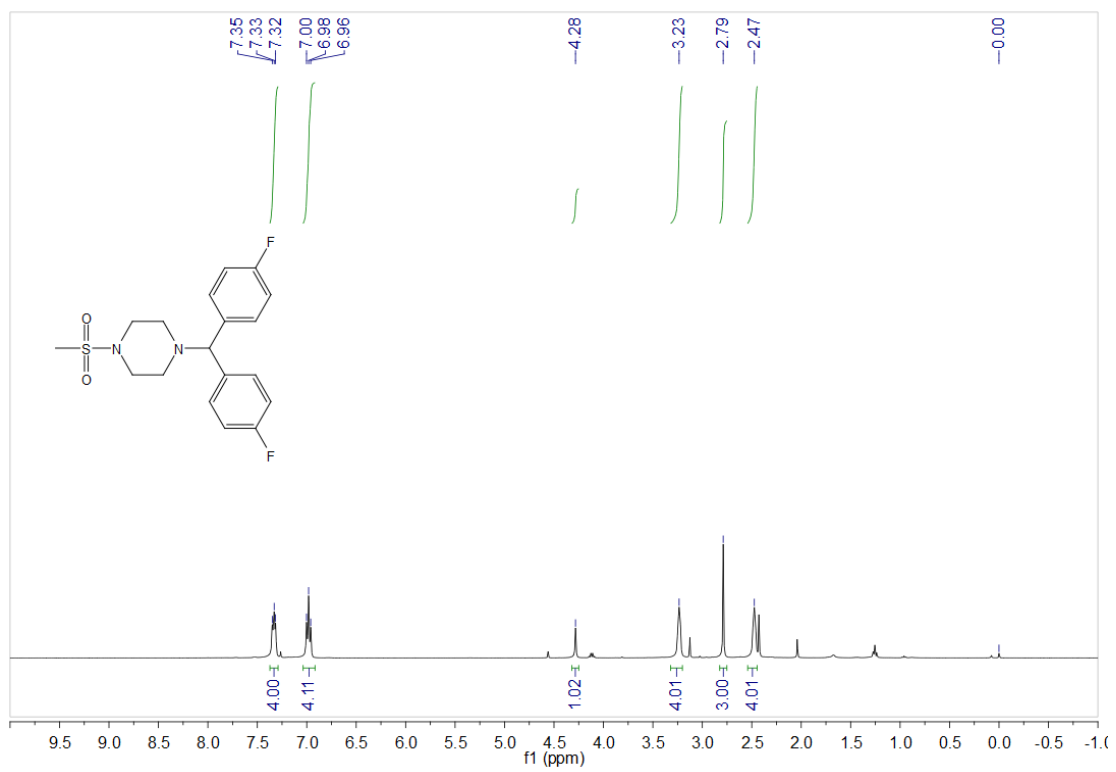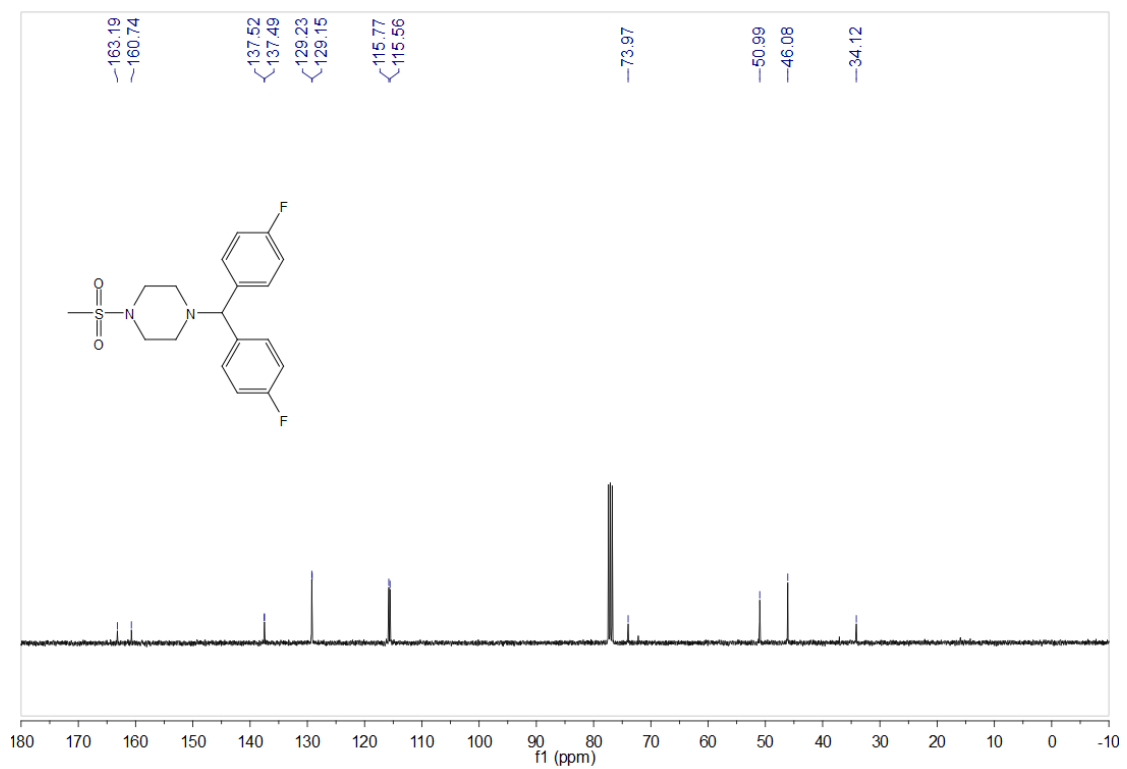

3u

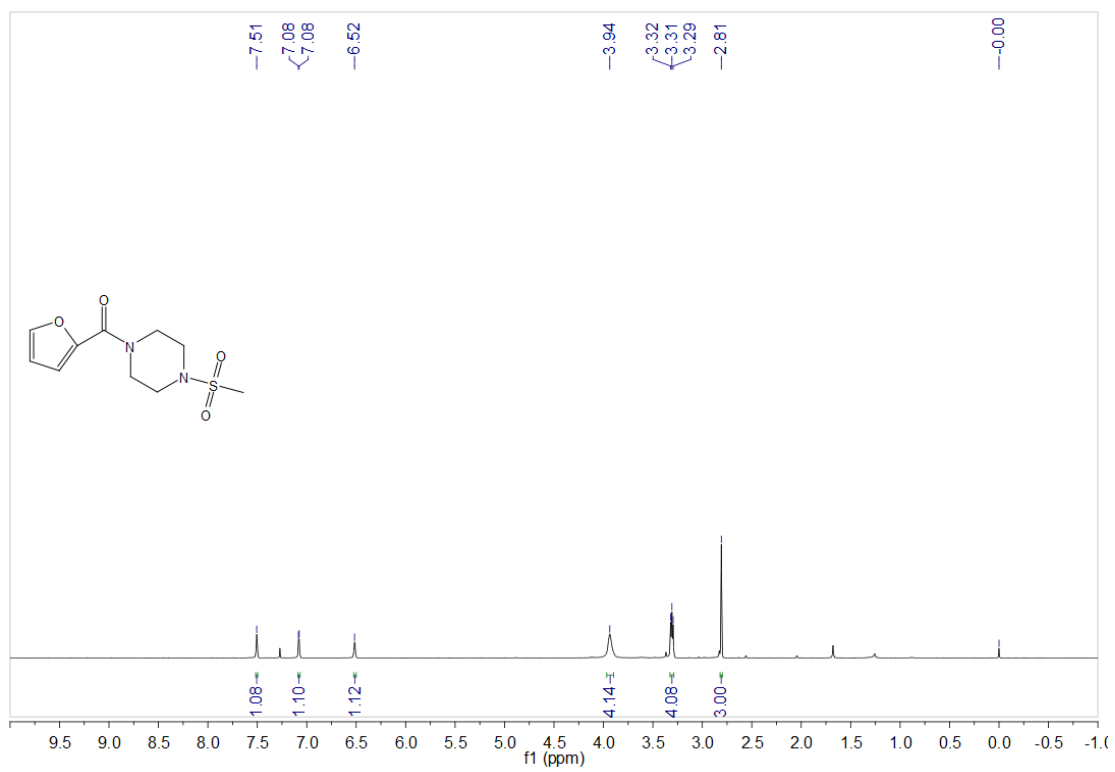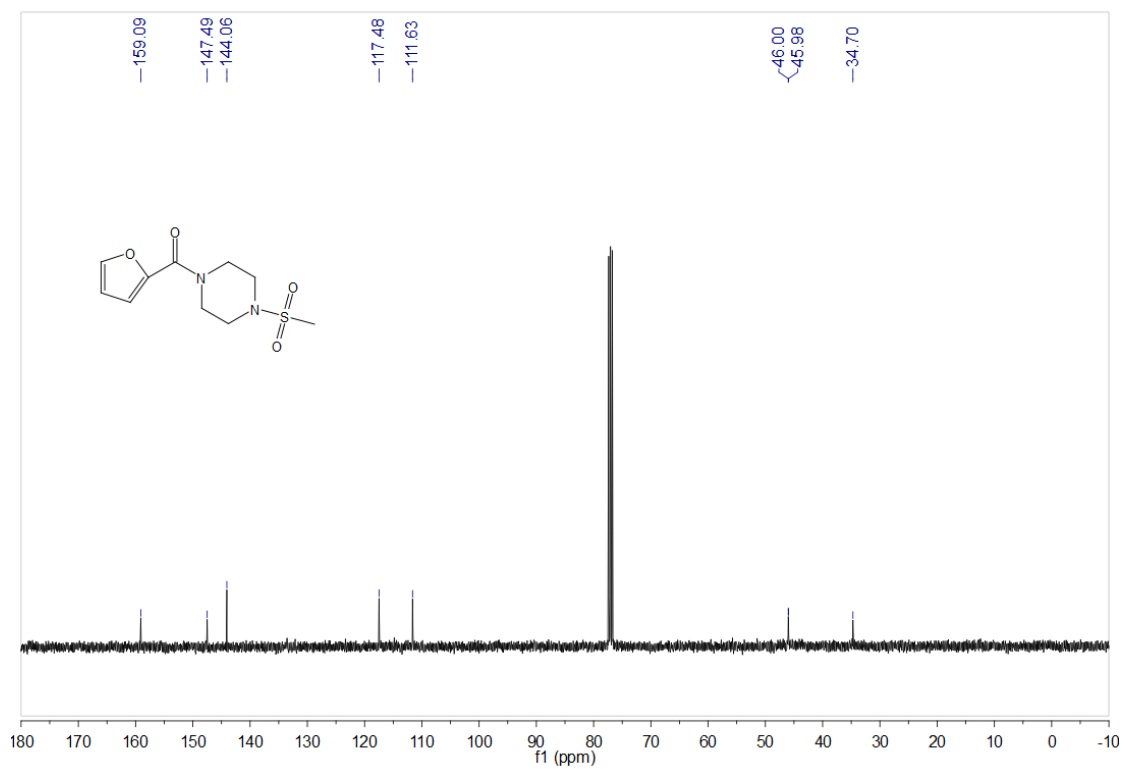

3v<sub>1</sub>

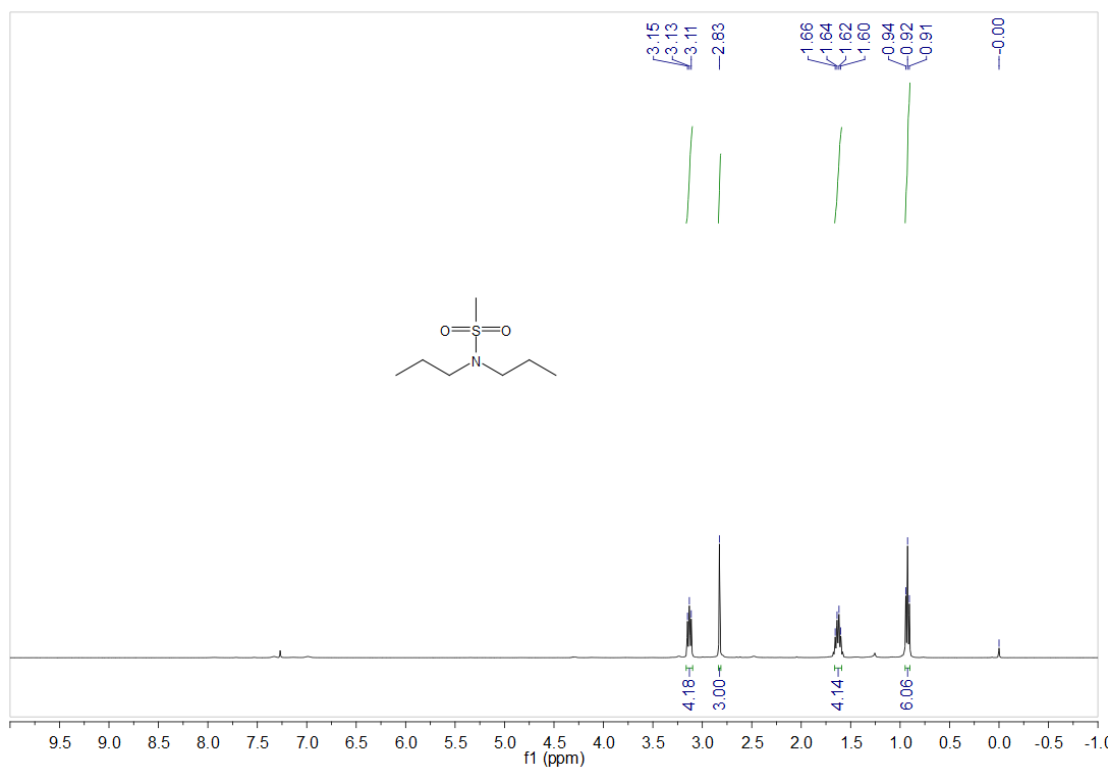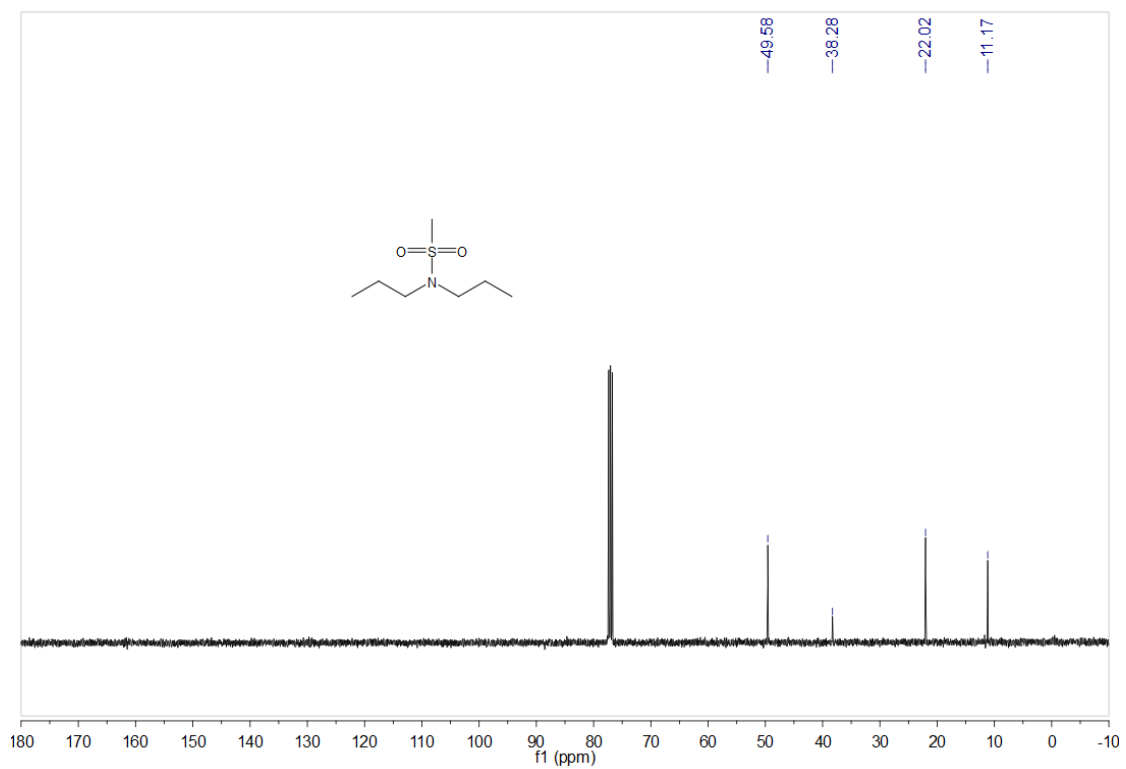



3v<sub>2</sub>

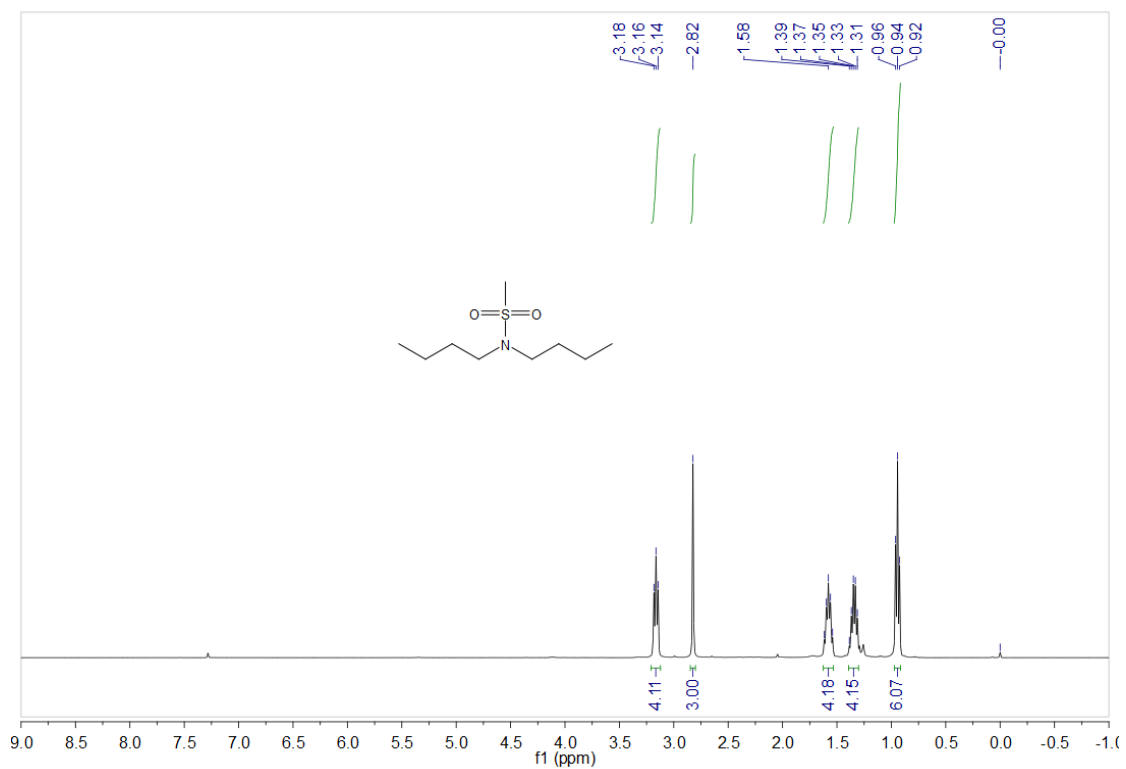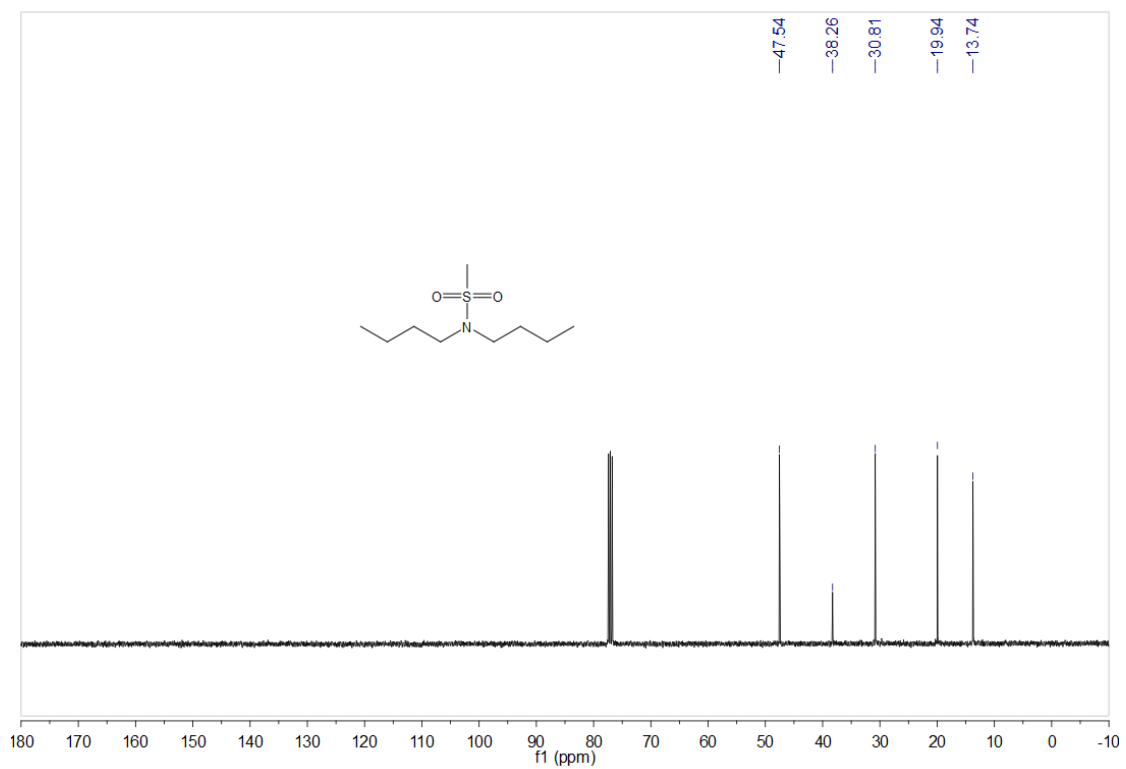

3w

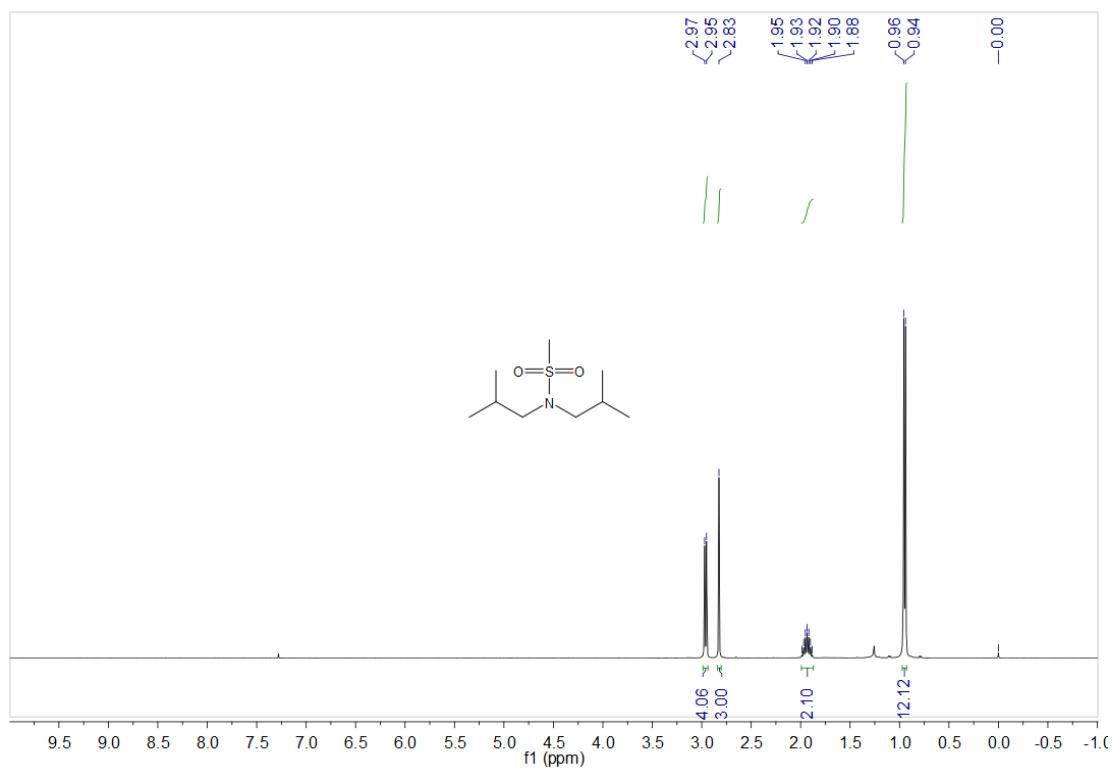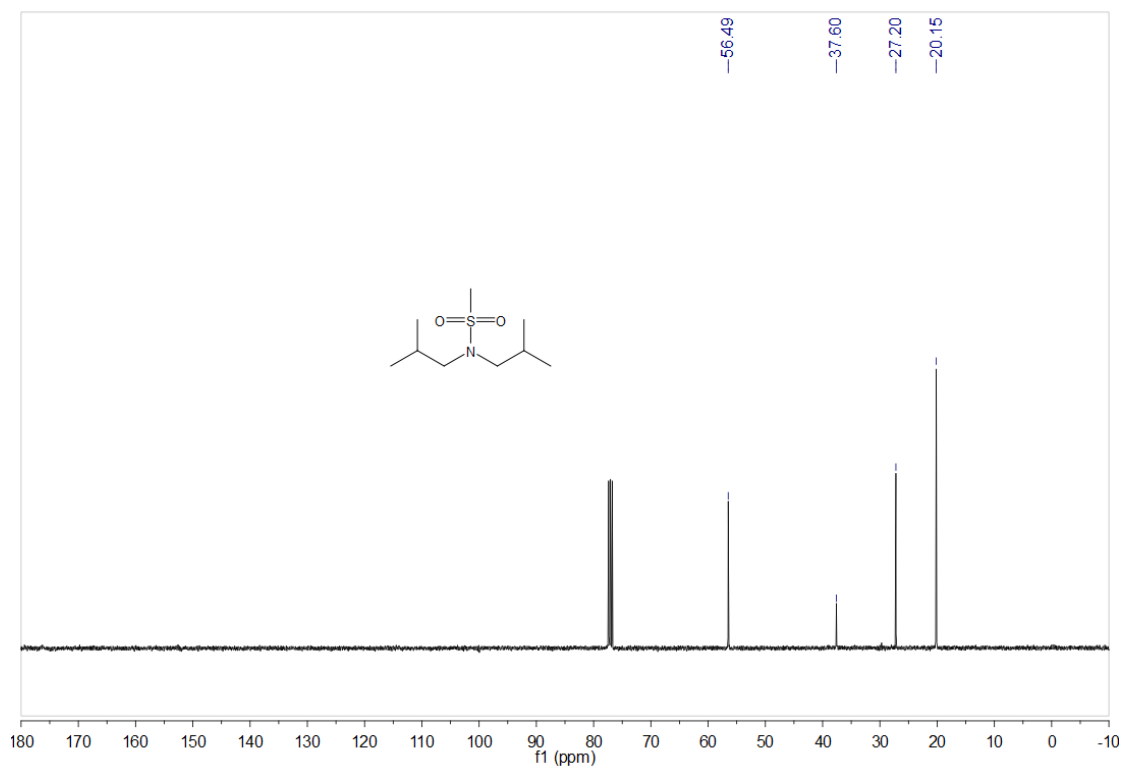

3x

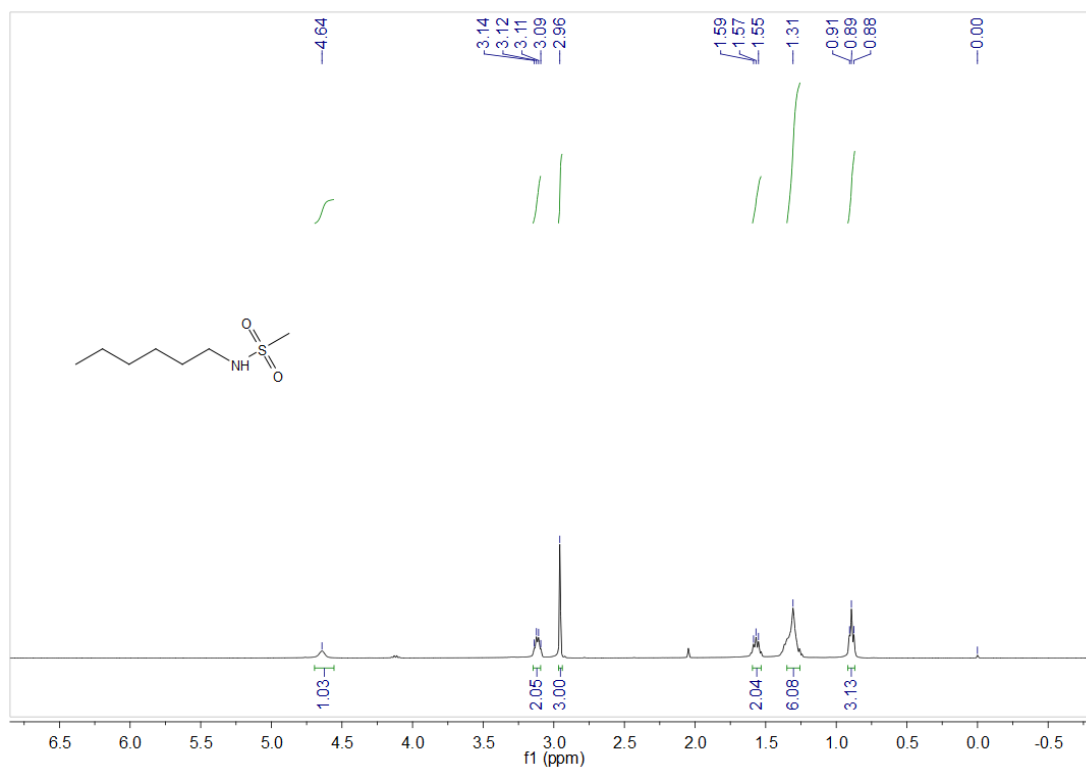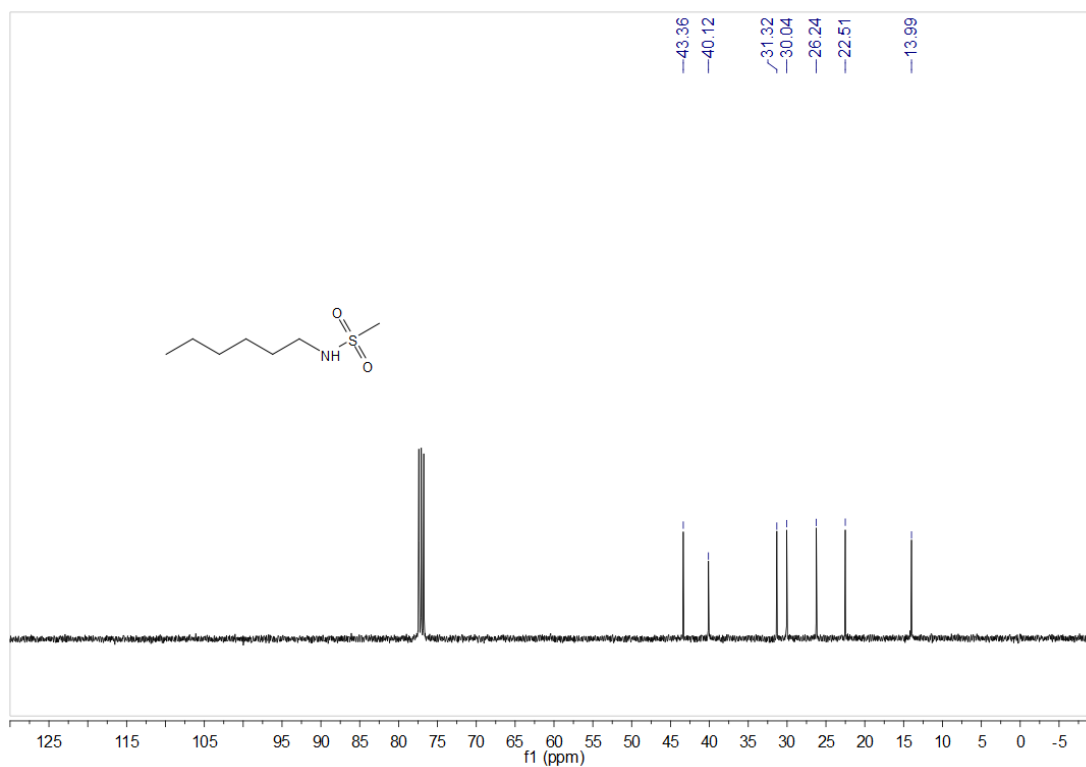

3y

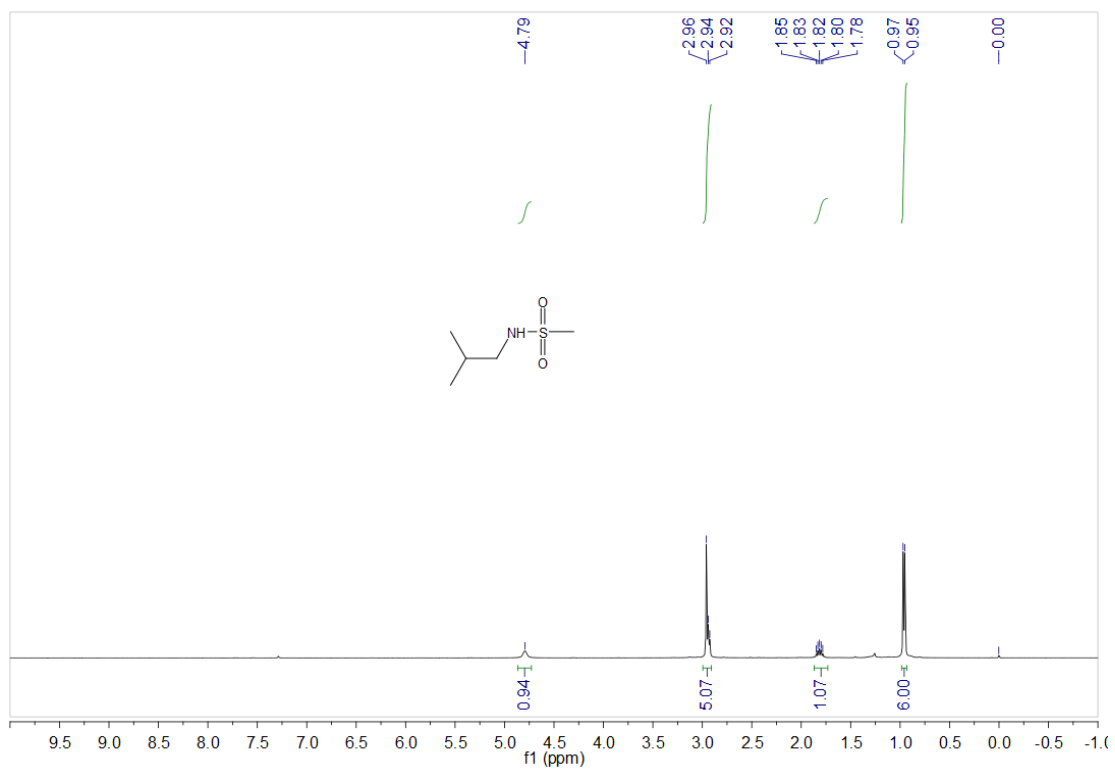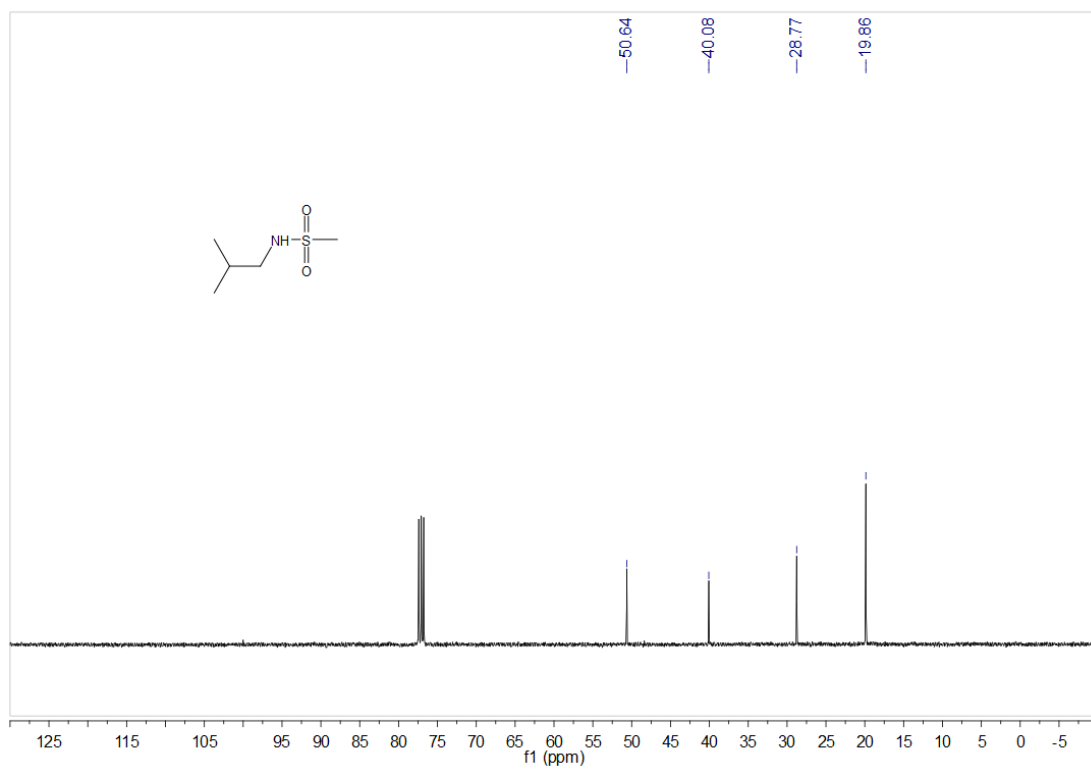

3z<sub>1</sub>

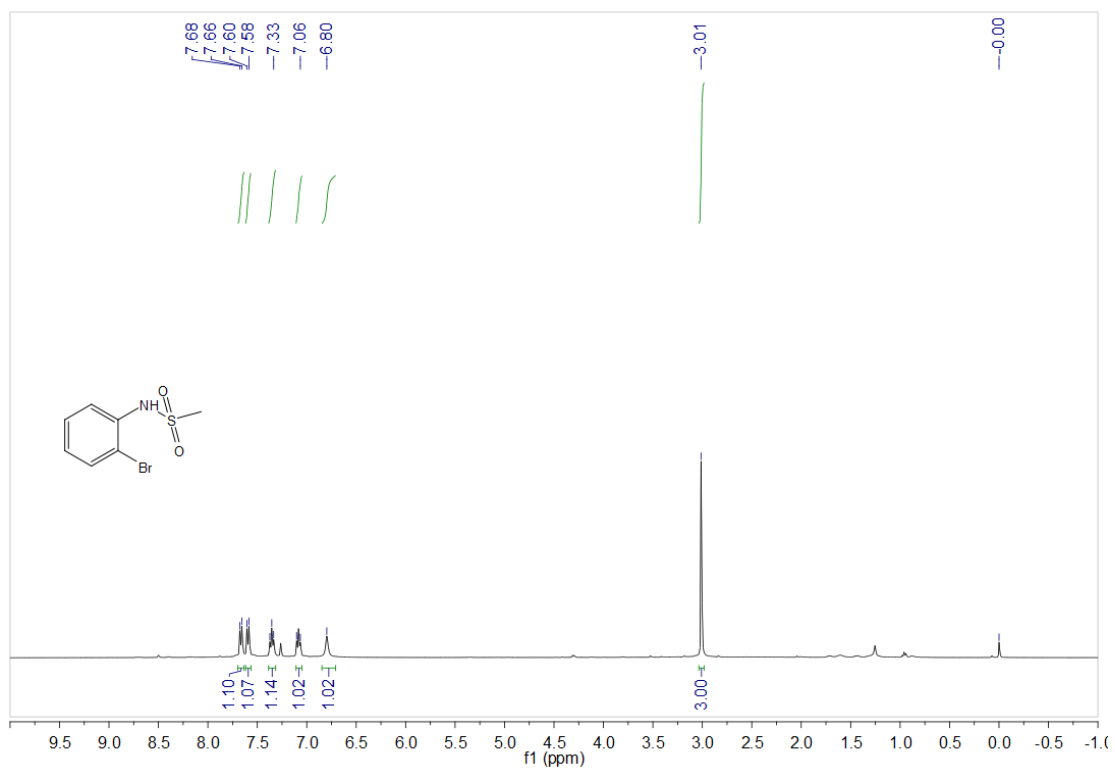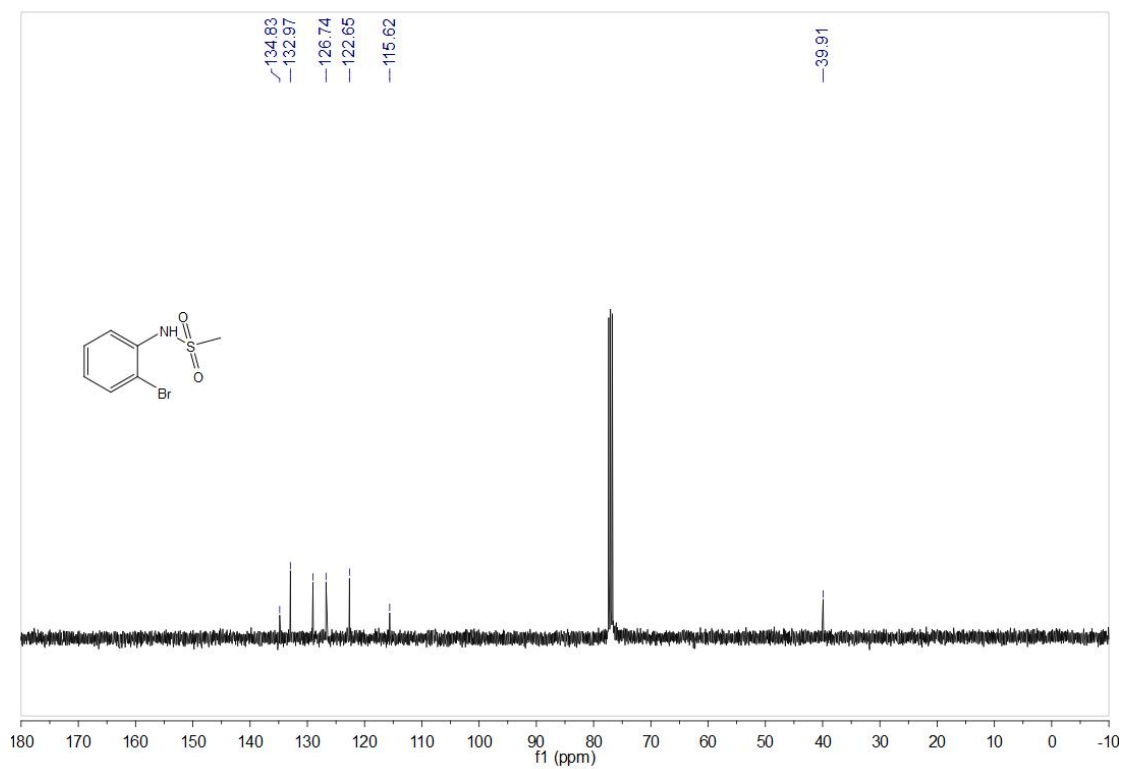

3z<sub>2</sub>

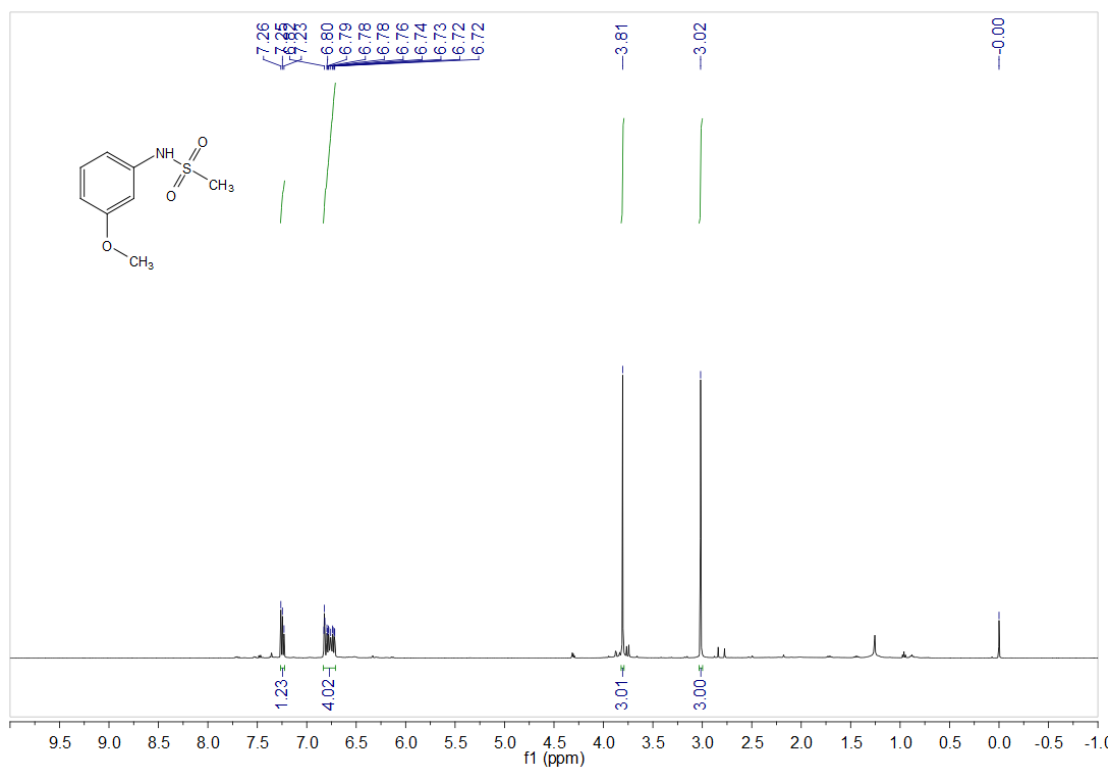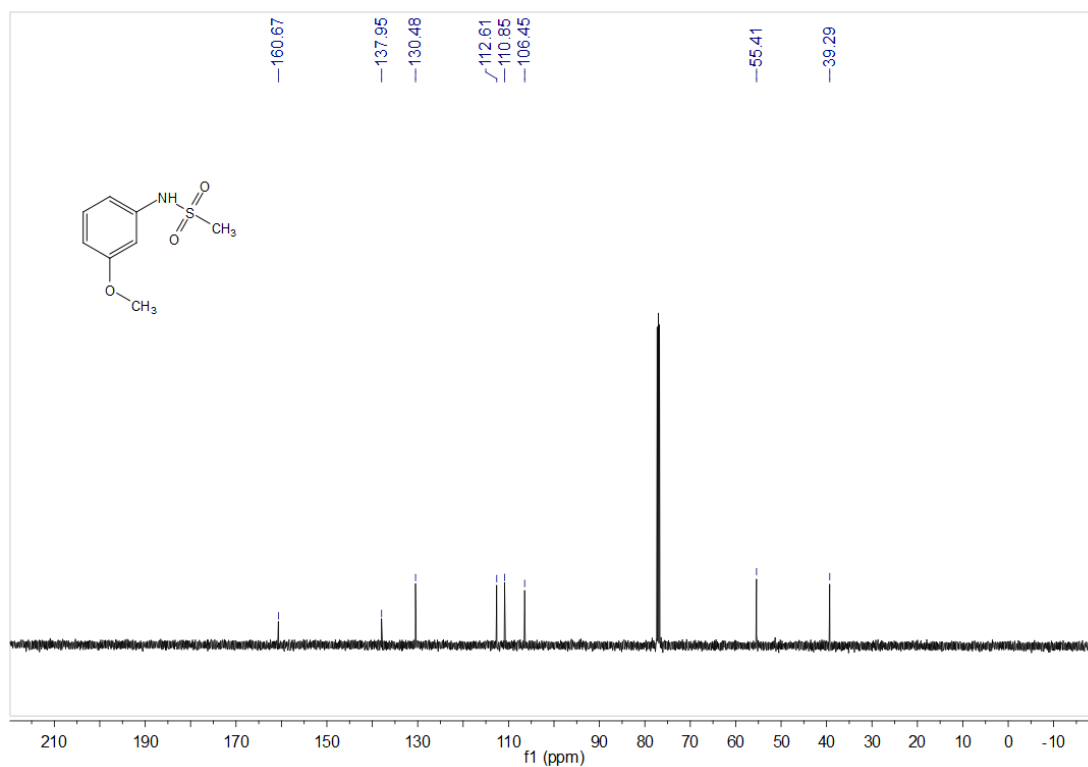

3z<sub>3</sub>

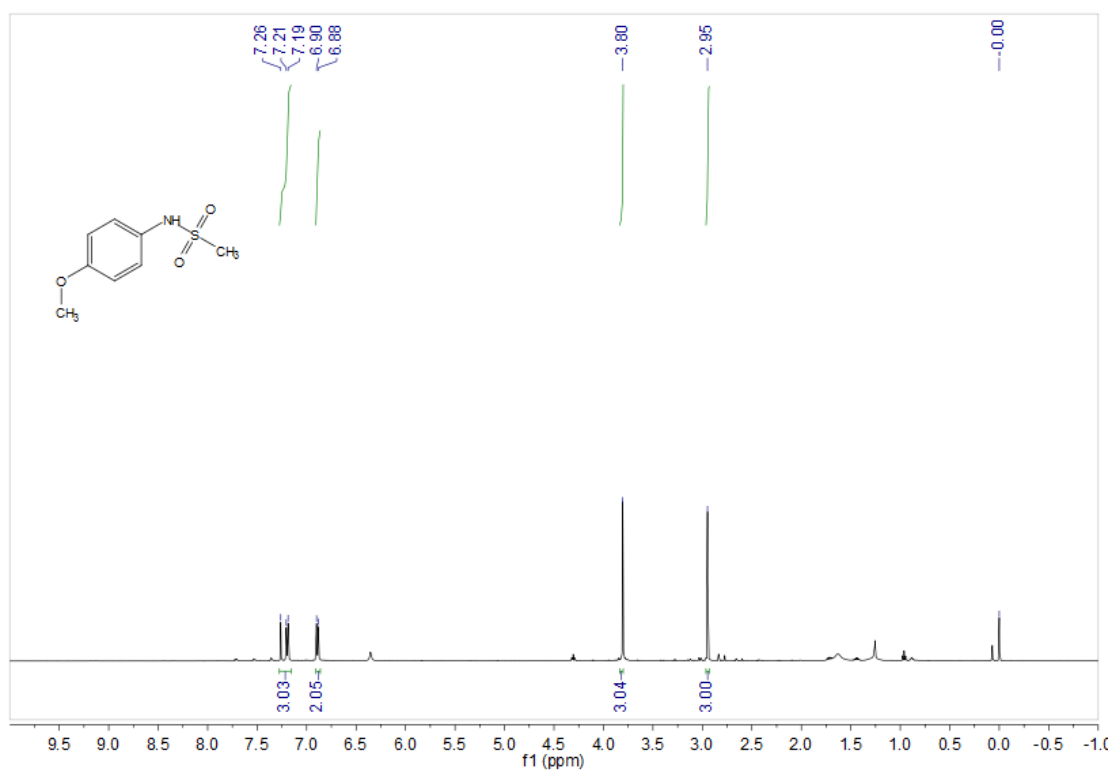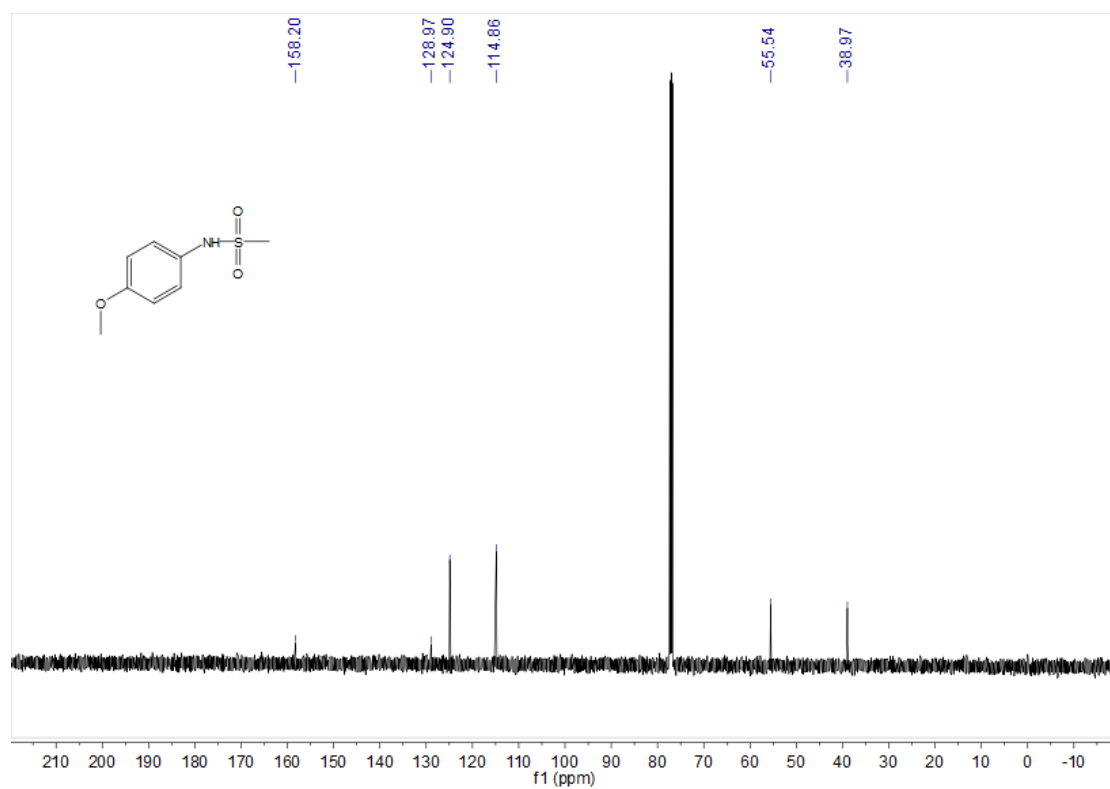

5a

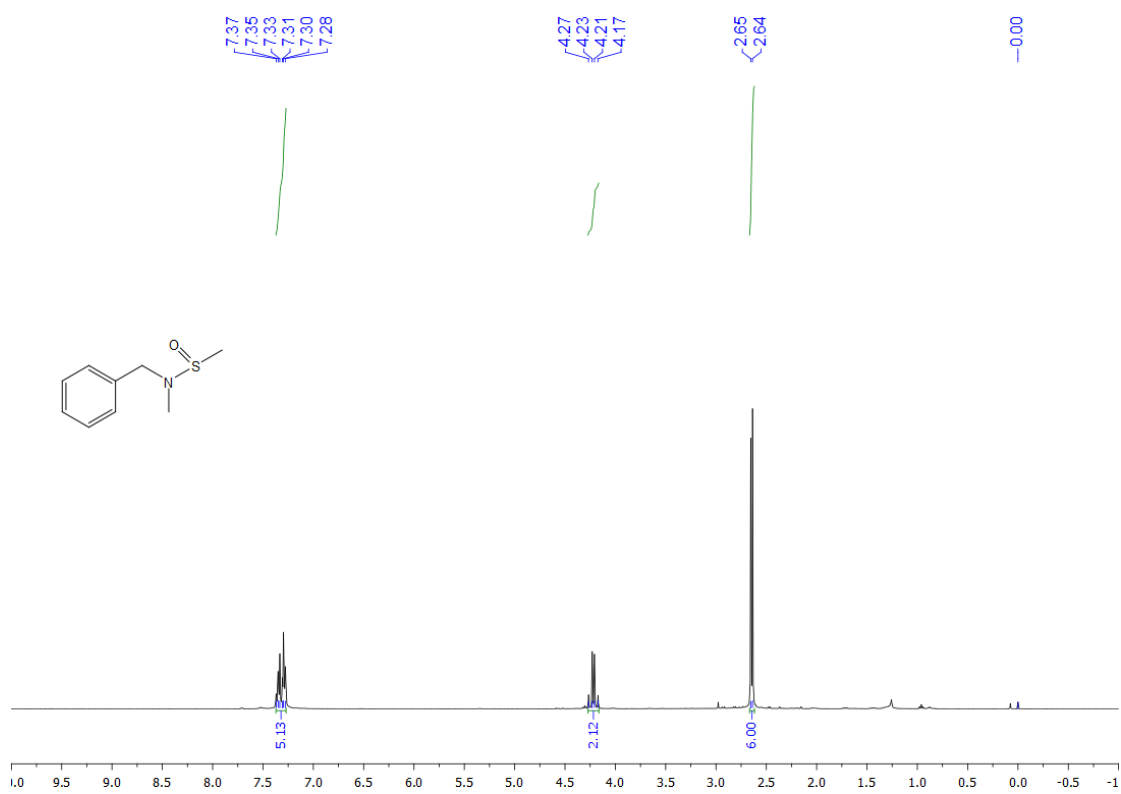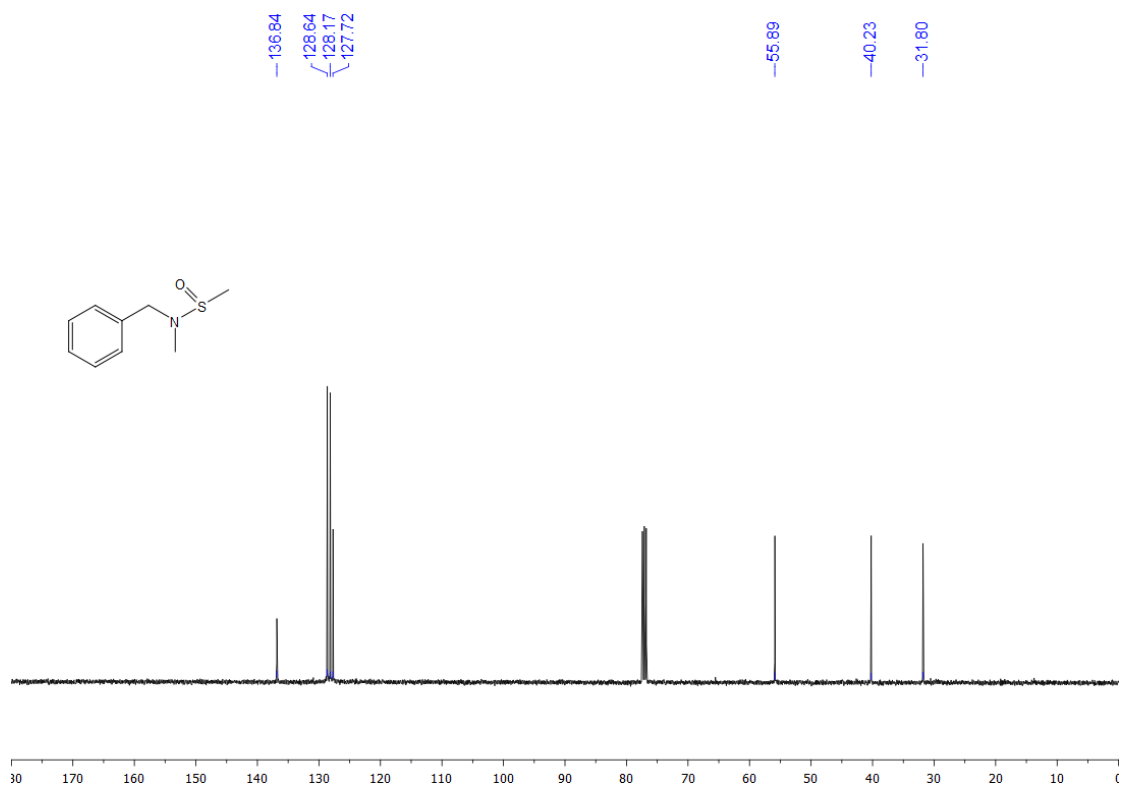

Supplement: d1cc00026h1.pdf [file d1cc00026h1.pdf]
